1 **Title**

2

3 Ocean acidification increases susceptibility to sub-zero air temperatures in ecosystem engineers

4 (*Mytilus* sp.): a limit to poleward range shifts

5

6 **Authors and addresses**

7 Jakob Thyrring<sup>1,2\*</sup>, Colin D. MacLeod<sup>1,3</sup>, Katie E. Marshall<sup>1</sup>, Jessica Kennedy<sup>1</sup>, Réjean Tremblay<sup>4</sup> &

8 Christopher D. G. Harley<sup>1,5</sup>

9

10 <sup>1</sup>Department of Zoology, University of British Columbia, V6T 1Z4, Vancouver, British Columbia,  
11 Canada

12 <sup>2</sup>Department of Ecoscience – Marine Ecology & Arctic Research Centre, Aarhus University, 8000,  
13 Aarhus C, Denmark

14 <sup>3</sup>Department of Biological Sciences, University of Alberta, T6G 2E9, Edmonton, Alberta, Canada

15 <sup>4</sup>Institut des sciences de la mer, Université du Québec à Rimouski, G5L 3A1, Rimouski, Quebec,  
16 Canada

17 <sup>5</sup>Institute for the Oceans and Fisheries, University of British Columbia, V6T 1Z4, Vancouver, British  
18 Columbia, Canada

19

20

21

22 \*Corresponding author: [thyrring@ecos.au.dk](mailto:thyrring@ecos.au.dk)

23

24 **ORCID**

25 *Jakob Thyrring* – 0000-0002-1029-3105

26 *Colin MacLeod* – 0000-0002-5963-3713

27 *Katie Marshall* – 0000-0002-6991-4957

28 *Jessica Kennedy* - 0000-0002-7979-1516

29 *Réjean Tremblay* – 0000-0003-2590-8915

30 *Christopher D.G. Harley* – 0000-0003-4099-943X

31 **Keywords**

32 Blue mussel; Intertidal; Fatty acids; LLT<sub>50</sub>; Multiple stressors; Thermal tolerance

33

34 **Abstract**

35 Ongoing climate change has caused rapidly increasing temperatures, and an unprecedented decline  
36 in seawater pH, known as ocean acidification. Increasing temperatures are redistributing species  
37 towards higher and cooler latitudes which are most affected by ocean acidification. Whilst the  
38 persistence of intertidal species in cold environments is related to their capacity to resist sub-zero air  
39 temperatures, studies have never considered the interacting impacts of ocean acidification and freeze  
40 stress on species survival and distribution. A full-factorial experiment was used to study whether  
41 ocean acidification increases mortality in *Mytilus* spp. following sub-zero air temperature exposure.  
42 We examined physiological processes behind variation in freeze tolerance using <sup>1</sup>H NMR  
43 metabolomics, analyses of fatty acids, and amino acid composition. We show that low pH conditions  
44 (pH = 7.5) significantly decrease freeze tolerance in both intertidal and subtidal populations of  
45 *Mytilus* spp. Under current day pH conditions (pH = 7.9), intertidal *M. trossulus* were more freeze  
46 tolerant than subtidal *M. trossulus* and *M. galloprovincialis*. Opposite, under low pH conditions,  
47 subtidal *M. trossulus* was more freeze tolerant than the other groups. We observed a marked shift  
48 from negative to positive metabolite-metabolite correlations across species under low pH conditions,  
49 but there was no evidence that the concentration of individual metabolites or amino acids affected  
50 freeze tolerance. Finally, pH-induced changes in the composition of cell membrane phospholipid  
51 fatty acids had no effect on survival. These results suggest that ocean acidification can offset the  
52 poleward expanding facilitated by warming, and that reduced freeze tolerance could result in a niche  
53 squeeze if temperatures become lethal at the equatorward edge.

54  
55  
56  
57  
58  
59  
60  
61

## 62 **1. Introduction**

63 The rapid rise in atmospheric CO<sub>2</sub> concentration since the industrial revolution has increased global  
64 air and water temperatures and caused ocean pH to decline (a process termed ocean acidification  
65 [OA]) at rates unprecedented in the geological history (Hönisch et al., 2012). These environmental  
66 changes are causing species range shifts and cascading ecological effects across the globe, resulting  
67 in regime shifts and altered food web structures (Kortsch et al., 2012; Wernberg et al., 2016). For  
68 example, the fish assemblage around the Svalbard archipelago, located in the Arctic Ocean (78°N),  
69 is borealizing as Arctic species have retracted northwards to cooler areas while boreal species have  
70 become dominant (Fossheim et al., 2015). Co-occurring OA is, furthermore, predicted to have severe  
71 consequences for marine organisms and communities, and a large body of research has shown a wide  
72 range of negative effects. Decreased pH weakens shell production (MacLeod and Poulin, 2015) and  
73 increases dissolution in calcifying organisms, which are therefore generally more vulnerable to OA  
74 compared to other organisms (Kroeker et al., 2010). Ocean acidification has also been found to  
75 increase heart rates in some invertebrate species (Lim and Harley, 2018) and alter benthic community  
76 structure (Brown et al., 2018). Elevated temperatures and OA have furthermore been observed to  
77 interact in various ways, causing heterogenic physiological responses across species, depending on  
78 taxon and life-stage (Harvey et al., 2013). Indeed, these two stressors may disproportionately alter  
79 species interactions and biodiversity in marine ecosystems (Franzova et al., 2019; Nagelkerken and  
80 Munday, 2016).

81 While the vast majority of OA and climate change research has focused on lower latitude systems,  
82 studies have rarely considered the impacts on species at their poleward edge. The poleward edge of  
83 subtidal ectotherms is determined by low water temperatures (Sunday et al., 2012), however the  
84 distribution of intertidal species is also controlled by their capacity to tolerate sub-zero air  
85 temperatures during emersion (Kennedy et al., 2020; Reid and Harley, 2021; Thyrring et al., 2019).

86 On rocky shores, canopy-forming macroalgae shelter the understory communities from extreme sub-  
87 zero air temperatures (Sejr et al., 2021), and where cold enough, an ice foot forms on the rocky  
88 surface, creating a warmer protective microhabitat increasing survivorship of intertidal organisms  
89 residing below (Scrosati and Eckersley, 2007; Thyrring et al., 2017a). However, as temperatures  
90 increase at the northern range edge where ice forms, organisms face sub-zero air temperatures when  
91 emerged at low tides as the ice foot melts, offsetting the otherwise facilitative effect of ocean warming  
92 on range expansions.

93 To survive sub-zero air temperature exposure, ectothermic animals depend on various freeze  
94 tolerance mechanisms (Storey and Storey, 1996; Toxopeus and Sinclair, 2018), yet despite the  
95 principle importance of freeze tolerance in sessile intertidal species, the underlying physiological  
96 processes remain poorly understood (Kennedy et al., 2020). Suggested mechanisms behind freeze  
97 mortality are excessive osmotic stress and structural damage to cell membranes, as ice forms in the  
98 extracellular water, dehydrating the cell and destabilizing the membrane (Meryman, 1971; Storey and  
99 Storey, 1988). To avoid cell dehydration, some species accumulate cryoprotectants, such as  
100 metabolites (low molecular weight cryoprotectants), to protect against intracellular osmotic stress as  
101 water is lost to the extracellular space. In intertidal bivalves, metabolites and anaerobic byproducts  
102 such as trimethylamine n-oxide (TMAO), betaine, taurine and strombine, likely to act as  
103 cryoprotectants, increasing freeze tolerance (Kennedy et al., 2020; Loomis et al., 1988). While under-  
104 explored, it also appears that many intertidal species may have an array of ice binding proteins that  
105 help manage ice growth and propagation (Box et al., 2022).

106 Freeze tolerance in some ectotherms is also associated with the composition of the cell membrane  
107 phospholipid fatty acids, which are sensitive to temperature variation (Hazel, 1995). Functional  
108 membranes must exist in a fluid liquid-crystalline phase maintained by the composition of the  
109 phospholipids. Low temperatures decrease membrane fluidity, and the membrane becomes partly

110 dysfunctional, losing selective properties and leaking cell contents (Hazel 1995). Ectotherms can  
111 counteract this effect by desaturating the membrane (increasing the proportion of unsaturated  
112 phospholipids) and adjusting cholesterol levels. This mechanism, termed homeoviscous adaptation,  
113 has been shown in a wide range of marine and terrestrial animals (Storey and Storey, 1988), and  
114 intertidal bivalves can remodel phospholipids in response to temperature changes (Pernet et al., 2007;  
115 Thyrring et al., 2017c; Williams and Somero, 1996). Despite this progress on the mechanisms of cold  
116 and freeze tolerance in intertidal species, it is completely unknown whether OA interacts with these.  
117 High latitude cold water is able to absorb significantly more CO<sub>2</sub> than lower latitude warmer water,  
118 and therefore seawater pH is decreasing most rapidly at these latitudes (Fassbender et al., 2017).  
119 Ocean acidification decreases pH in osmoconformers with a low capacity to regulate internal pH  
120 levels (e.g., bivalves), which could lead to disruption of cellular processes, and shifts in osmotic  
121 balance (Wittmann and Pörtner, 2013; Zhao et al., 2020). Thus, OA may decrease freeze tolerance  
122 and increase animal vulnerability to sub-zero air temperature exposure, yet the interaction between  
123 OA and freeze tolerance interactions remains to be explored.

124 Bivalves of the genus *Mytilus* are distributed in intertidal habitats in both the Northern and Southern  
125 Hemisphere (Hilbish et al., 2000; Mathiesen et al., 2017). *Mytilus* sp. are commercially, and  
126 ecologically important ecosystem engineers creating habitats for a diverse associated fauna and are  
127 widely used as model organisms for studying impacts of various stressors (Barrett et al., 2022;  
128 Telesca et al., 2019; Thyrring et al., 2015). *Mytilus* sp. can survive tissue freezing, and are expanding  
129 at higher latitudes in response to global warming (Thyrring et al., 2017a), however, the performance  
130 and survival of *Mytilus* sp. at their poleward edge remain poorly understood.

131 The focus of this study is two *Mytilus* spp. found in British Columbia, Canada; the invasive  
132 Mediterranean mussel *M. galloprovincialis*, and the native bay mussel *M. trossulus*, allowing a  
133 comparison of responses among native and invasive species. By investigating the effects of OA on

134 freeze tolerance in these species, we test the hypothesis that OA will generally increase mortality in  
135 intertidal species living near their poleward range edge due to an increased susceptibility to sub-zero  
136 air temperatures during emersion. Mussels from both the intertidal and subtidal realm were  
137 investigated to detect whether previous exposure to air has any effects on freeze tolerance.  
138 Specifically, we predict that (1) intertidal animals are more freeze tolerant than subtidal conspecifics,  
139 (2) native *M. trossulus* is more freeze tolerant than *M. galloprovincialis*, and (3) OA will increase  
140 freeze mortality in both species. Finally, we hypothesize that mechanistic processes including (I) a  
141 destabilized cell membrane caused by variation in the unsaturation state of membrane phospholipids,  
142 (II) and variation in the composition and concentration of selected molecular cryoprotectants will  
143 explain variation in freeze tolerance.

144

## 145 **2. Materials and Methods**

### 146 *2.1 Animal collection and holding conditions*

147 Three categories of *Mytilus* mussels were collected on 8–10 December 2019 in the strait of Georgia,  
148 British Columbia, Canada; 1) subtidal *M. galloprovincialis* obtained from an aquaculture farm at  
149 Saltspring Island, 2) subtidal *M. trossulus* collected from floating docks at the Jericho Royal  
150 Vancouver Yacht Club in the Burrard Inlet, and 3) intertidal *M. trossulus* collected at low tide from  
151 Tower Beach in the Burrard Inlet (Collection permit number XMCFR 7 2019; Fisheries and Oceans  
152 Canada). Intertidal *M. galloprovincialis* was not considered as no intertidal populations are  
153 established in region. All mussels were kept for a 72-hour adjustment period in aerated aquaria of  
154 similar environmental conditions as the collection site measured on the days of collection (7°C, pH  
155 = 7.9, and salinity 20.5). No mussels died during the adjustment period.

156 Prior to sub-zero air temperature exposure, mussels were maintained in low (7.50 pH) or control (7.90  
157 pH) conditions for 10 days using three incubators (Panasonic MIR 154, Panasonic, Japan) for low pH

158 conditions and three for control conditions (no mussels died during the 10 days). Each incubator was  
159 set to 7°C and contained three 5L glass aquarium that held three envelopes of 0.5cm gauge, rigid  
160 plastic mesh (25×24cm) that separated the three categories of mussel but allowed easy flow through  
161 of seawater (salinity 20-21). Each envelope was marked with a different colored zip tie to indicate  
162 which category of mussel it contained.

163

## 164 *2.2 Seawater manipulation*

165 The two selected pH conditions covered a realistic range of pH values currently observed or predicted  
166 for the Southern Strait of Georgia; a control (pH = 7.9) and a low pH treatment (pH = 7.5) (Ianson et  
167 al., 2016). The low pH treatment was established by using two Smart-Trak® mass flow controllers  
168 (Sierra Instruments, Inc., CA, USA) to mix 100% CO<sub>2</sub> (PraxAir Canada Inc., CB, Canada) and CO<sub>2</sub>-  
169 free air, which was then bubbled into three acidified seawater aquaria to achieve target values of 7.50  
170 pH. CO<sub>2</sub>-free air was generated by using a small compressor to pump ambient air through a 500 mL  
171 Nalgene canister that contained Soda Lime (Ormond Veterinary Supply Ltd., ON, Canada). A flow  
172 rate of 3.3 cm<sup>3</sup>/s of 100% CO<sub>2</sub> gas and 4.11 L/min of CO<sub>2</sub>-free air was used to reach the target pH.  
173 Our system also removed moisture from ambient air to protect the mass flow controllers from water  
174 damage. This was achieved by running the ambient-air gas lines through a small refrigerator to reduce  
175 air temperature and cause water to precipitate into a water trap, and by installing a second 500 mL  
176 Nalgene containing desiccant (WA Hammond Drierite, OH, USA) in series with the soda lime  
177 container. Control conditions (7.90 pH) were maintained by mixing ambient air and CO<sub>2</sub>-free air. The  
178 use of CO<sub>2</sub>-free air was necessary as ambient air was artificially high in CO<sub>2</sub> due to poor ventilation  
179 in the lab. As with the low pH treatment, ambient air was pumped through a Soda Lime-filled 500  
180 mL Nalgene canister using a small compressor before being connected to a three-way splitter and  
181 bubbled into seawater aquaria, while ambient air was bubbled into the control aquaria using a second

182 set of tubes connected to low power aquarium air pumps (Fusion 700 Air Pump). Air flow from the  
183 small aquarium pumps was fine-tuned by placing an adjustable clamp on the flexible tubing which  
184 connected pump and air stone to increase or decrease the flow of CO<sub>2</sub> enriched ambient air to achieve  
185 7.90 pH. Carbon dioxide in ambient “lab” air was monitored constantly using a Qubit S151 CO<sub>2</sub> gas  
186 analyzer (Qubit Systems, ON, Canada), which showed that CO<sub>2</sub> fluctuated during the day between  
187 400 ppm and 600 ppm CO<sub>2</sub> reaching the maximum during the day while people were working in the  
188 lab. Consequently, the input of ambient air into control tanks was monitored and adjusted daily  
189 (mainly during the day) to maintain target pH values. Prior to adjusting seawater pH, we mixed  
190 filtered seawater (provided by the Vancouver Aquarium and transported by the City of Vancouver)  
191 with de-chlorinated distilled fresh water to create a 20-21 ppt solution which was the salinity recorded  
192 at the collection sites. Mussels were able to feed on phytoplankton naturally occurring in the water,  
193 and we replaced 50% of the seawater from each tank daily to prevent the buildup of faeces and  
194 maintain uniform seawater chemistry parameters.

195

### 196 *2.3 Carbonate chemistry*

197 Seawater pH was measured daily in all aquaria using a hand-held pH meter (Table 1 - Oakton pH 450  
198 ( $\pm 0.01$  pH), Oakton Instruments, IL, USA) calibrated with two saltwater buffers, as described in  
199 (MacLeod et al., 2015) to provide pH measurements on the Total Hydrogen Ion Scale (pH<sub>T</sub>). To  
200 further characterize the seawater carbonate chemistry, seawater samples (300 mL) were collected  
201 from one randomly selected aquarium in each incubator at the start and end of the experiment. These  
202 samples were fixed with a saturated solution of mercuric chloride (RICCA Chemical Company, TX,  
203 USA) and analyzed using the “burke-o-lator” at Hakai Institute (Quadra Island, BC, Canada) (for  
204 details of this system see (Evans et al., 2019)). This analysis generated values for DIC and pCO<sub>2</sub>  
205 which were then used in combination with temperature and salinity data to calculate all relevant



206 carbonate parameters (Supplementary Table S1) using the MATLAB version of CO2SYS (van  
207 Heuven et al., 2011).

208

#### 209 2.4 Sub-zero temperature exposure

210 After 10 days, mussels were exposed to seven sub-zero air temperatures (-5, -6, -7, -8, -9, -12, -15  
211 °C) for two hours by placing animals in individual plastic tubes inserted in wells drilled into a  
212 precooled aluminum block cooled by refrigerated circulation baths (Thermo Fisher Scientific Inc.,  
213 MA, USA). Fifteen mussels (mean shell length 37.69 mm  $\pm$  3.14 s.d.) from each mussel category  
214 (subtidal *M. galloprovincialis* and *M. trossulus*, and intertidal *M. trossulus*) and pH condition (pH  
215 =7.9 and pH = 7.5) were used at every temperature for a total of 720 mussels. Individual body  
216 temperatures were recorded at 0.5 s intervals using Type-T thermocouples (Omega, QC, Canada)  
217 placed next to the shell inside the plastic tube and connected to TC-08 thermocouples interfaces (Pico  
218 Technology, United Kingdom) that interfaced to a computer running PICOLOG software (Picotech,  
219 United Kingdom), which continuously monitored body temperatures. Continuously body temperature  
220 monitoring allowed us to determine any exothermic release of heat owing to ice formation. The lowest  
221 temperature prior to this event is termed the supercooling point (SCP), and the SCP indicates that  
222 internal ice formation occurred. After two hours of sub-zero air exposure, all mussels were transferred  
223 back to their respective pre-freezing pH condition aquaria for recovery where they were monitored  
224 daily for five days to record mortality. Mortality was checked daily with mussels considered dead if  
225 they did not close their shells when touched. Dead mussels were immediately removed from the  
226 aquaria, and had their shell length measured to nearest mm.

227

228

229

230 *2.5 Amino acid analysis*

231 Total amino acid analysis was performed on gill tissue from mussels collected after 10 days of pH  
232 exposure (mean dry weight = 15.46 mg  $\pm$ 0.61 s.d.,  $n = 5$ ) at the Proteomics, Analytics, Robotics &  
233 Chemical Biology Centre (SPARC - [https://lab.research.sickkids.ca/sparc-molecular-](https://lab.research.sickkids.ca/sparc-molecular-analysis/services/amino-acid-analysis/)  
234 [analysis/services/amino-acid-analysis/](https://lab.research.sickkids.ca/sparc-molecular-analysis/services/amino-acid-analysis/)), Hospital for Sick Children, Toronto, ON, Canada, using the  
235 Water Pico-Tag System (Water Corporation, WA, USA). The final concentration of each amino acid  
236 was calculated in  $\mu\text{g}\cdot\text{mg}^{-1}$  and then expressed as relative concentration (% of total amino acids). It  
237 should be noted that this amino acid analysis did not allow discrimination between Asn/Asp and  
238 Gln/Glu.

239

240 *2.6 Fatty acid analysis*

241 Fatty acid (FA) analyses were performed on gills (collected after 10 days of pH exposure), a tissue  
242 exposed directly to temperature changes (mean wet weight = 0.38g  $\pm$ 0.1 s.d.,  $n = 5$ ). Total lipids  
243 were extracted by grinding in a dichloromethane: methanol (2:1, v/v) solution following a slightly  
244 modified Folch procedure (Parrish, 1999). Lipid extracts were separated into neutral and polar  
245 fractions by column chromatography on silica gel micro-columns (30  $\times$  5 mm i.d., packed with  
246 Kieselgel 60, 70–230 mesh; Merck, Germany) using chloroform: methanol (98:2, v/v) to elute neutral  
247 lipids, followed by methanol to elute polar lipids (Marty et al., 1992). Fatty acid profiles were  
248 determined on fatty acid methyl esters (FAMES) using sulphuric acid:methanol (2:98, v/v) and  
249 toluene. FAMES of neutral and polar fractions were concentrated in hexane, and the neutral fraction  
250 was purified on an activated silica gel with 1 ml of hexane:ethyl acetate (1:1 v/v) to eliminate free  
251 sterols. FAMES were analyzed in the full scan mode (ionic range: 60–650 m/z) on a Polaris Q ion  
252 trap coupled multi-channel gas chromatograph 'Trace GC ultra '(Thermo Scientific, USA) equipped  
253 with an auto sampler model Triplus, a PTV injector and a mass detector model ITQ900 (Thermo

254 Scientific, USA). The separation was performed with an Omegawax 250 (Supelco) capillary column  
255 with high-purity helium as a carrier gas. Data were treated using Xcalibur v.2.1 software (Thermo  
256 Scientific, USA). Methyl nondecanoate (19:0) was used as an internal standard. FAMES were  
257 identified and quantified using known standards (Supelco 37 Component FAME Mix and menhaden  
258 oil; Supelco) and were further confirmed by mass spectrometry (Xcalibur v.2.1 software).

259

## 260 2.7 <sup>1</sup>H NMR analysis

261 One-dimensional, 600 MHz proton nuclear magnetic resonance spectroscopy (<sup>1</sup>H NMR) was used to  
262 measure the metabolite profiles of gill tissue (collected after 10 days of pH exposure). <sup>1</sup>H NMR is  
263 ideal for measuring low molecular weight, polar metabolites such as osmolytes and anaerobic  
264 byproducts. Sample preparation was based on (Cappello et al., 2013). A 100 mg sample of gill tissue  
265 was excised ( $n = 5$ ), dried with a Kimwipe to remove excess water and frozen at  $-80^{\circ}\text{C}$ . Frozen tissue  
266 was homogenized in 400  $\mu\text{l}$  cold methanol and 85  $\mu\text{l}$  cold water-xylitol solution (5 mM xylitol as an  
267 internal control) using a bead homogenizer (Bullet Blender 50 Gold Model: BBX24, Next Advance)  
268 with approximately 200  $\mu\text{l}$  of 3.2 mm round stainless steel beads, for 10 min at setting 8 in 1.5 ml  
269 microcentrifuge vials. After adding 400  $\mu\text{l}$  chloroform and 200  $\mu\text{l}$  water to the samples, they were  
270 vortexed for 60 s, left on ice for 10 min for phase separation, and centrifuged for 5 min at 2000 rpm.  
271 The upper methanol layer (600  $\mu\text{l}$ ) containing the polar metabolites was transferred into new vials,  
272 dried in a centrifugal vacuum concentrator (Eppendorf 5301), and then stored at  $-80^{\circ}\text{C}$ . Immediately  
273 prior to <sup>1</sup>H NMR analysis, the dried polar extracts were resuspended in 600  $\mu\text{l}$  of 0.1 mol/l sodium  
274 phosphate buffer (pH 7.0, 50% deuterium oxide, Sigma-Aldrich) containing 1 mmol/l 2,2-dimethyl-  
275 2-sila-pentane-5-sulfonate (DSS; Sigma-Aldrich) as internal reference. The mixture was vortexed for  
276 60 s and transferred to a 5 mm NMR tube.

277 <sup>1</sup>H NMR spectra were acquired using Bruker Avance 600 with cryoprobe and Bruker Avance III 600  
278 spectrometers. TopSpin software version 2.1 (Bruker) was used to process spectra collected with the  
279 Bruker Avance 600 spectrometer with cryoprobe, and TopSpin version 3.5 (Bruker) was used with  
280 the Bruker Avance III 600 spectrometer. Experiments required 15 minutes of acquisition time and  
281 were performed at room temperature.

282 Peak identification of the NMR spectra was performed with Chenomx NMR Suite 9.0 (Chenomx,  
283 AB, Canada) that uses the Human Metabolome Database compound spectral reference library  
284 (Wishart et al., 2018). First, line broadening of 2.5 Hz, automatic phase correction, and manual  
285 baseline correction were performed with Chenomx Processor (within the Chenomx NMR Suite  
286 software). Then, determination of metabolite concentrations was performed using Chenomx Profiler,  
287 which determines the concentrations of individual metabolites using the concentration of a known  
288 DSS signal. Metabolite concentrations are reported as mmol/100 mg gill wet mass.

289

## 290 *2.8 Statistical analysis*

### 291 *2.8.1 Survival*

292 Statistical analyses were performed using the R software (R version 3.5.2). A logistic regression  
293 model was used to calculate LLT<sub>50</sub> values (the lower lethal temperature where 50% of the population  
294 survived). A binomial generalized linear model (GLM) with a logit link function, was used to  
295 determine the effects of air temperature and pH treatment on survival within each mussel category,  
296 and the difference in LLT<sub>50</sub> were estimated using 95% confidence intervals (CI) with non-overlapping  
297 CI indicating a significant difference (Deere et al., 2006). Differences in the supercooling point (SCP)  
298 among mussel categories and pH treatment was analyzed using a two-way ANOVA. Final models  
299 were validated by plotting residuals versus fitted values, versus each covariate in the model (Zuur  
300 and Ieno, 2016).

## 301 2.8.2 *Metabolomics and fatty acids*

302 Generalized linear models and ANOVAs were used to determine which metabolites and fatty acids  
303 differed significantly after low pH exposure. Pearson's correlations were furthermore used to detect  
304 alternations in metabolite-metabolite associations following low pH conditions (Jahagirdar and  
305 Saccenti, 2020), and relationships were visualized using heat maps. The fatty acids explaining most  
306 of the dissimilarity between mussel categories and pH treatments were identified using a SIMPER  
307 analysis (See the full list of FA founds in Supplementary Table S2). This analysis revealed that 13  
308 fatty acids explained ~90% of the Bray–Curtis dissimilarity amongst fatty acid profiles between the  
309 control and low pH environment (Table 2). We therefore focused all subsequent fatty acid analyses  
310 on these 13 fatty acids. Principle component analysis (PCA) was used to the interpretation of  
311 differences in the metabolomic composition among mussel categories. ANOVAs were used to  
312 evaluate differences in the concentrations of amino acids, and GLMs to evaluate the distribution of  
313 saturated fatty acids (SFA), monounsaturated fatty acids (MUFAs), polyunsaturated fatty acids  
314 (PUFAs), and the unsaturation index (UI), which is an index for the number of double bonds per 100  
315 molecules of fatty acids, among the three mussel categories and pH Treatment. Post-hoc pair-wise  
316 tests were used to compare significant treatment effects ( $P < 0.05$ ). Detailed data exploration was  
317 carried out prior to any analysis (Zuur et al., 2010). Once valid models were identified, we re-  
318 examined the residuals to ensure all model assumptions were acceptable.

319

## 320 **3. Results**

### 321 *3.1 Survival*

322 Validation of ANOVAs and GLM models indicated no violation of model assumptions. There were  
323 no significant effects of pH conditions (ANOVA;  $p > 0.05$ ) or mussel categories (ANOVA;  $p > 0.05$ )

324 on the SCP, and freezing of the tissue was observed in all mussels exposed to temperatures below -  
325 7°C.

326 We investigated the effect of pH and sub-zero air temperature on survival using GLMs. There were  
327 no significant interactions between the effect of pH and air temperature on any mussel category, and  
328 the interaction term was excluded in the final GLM models. Lower sub-zero air temperature  
329 significantly decreased the survival of mussel in all three categories exposed to both control and low  
330 pH conditions (Fig. 1; Supplementary Table S3). Under control conditions (pH = 7.9), the lower lethal  
331 temperature at which 50% of the population perish (LLT<sub>50</sub>) was significantly lower in intertidal *M.*  
332 *trossulus* (-10.56 °C ± 0.80 CI) compared to subtidal *M. trossulus* (-9.12°C ± 0.48 CI) and subtidal  
333 *M. galloprovincialis* (-7.62 °C ± 0.49 CI), which was the least freeze tolerant species (Fig. 1).  
334 Following exposure to low pH (pH = 7.5), survival significantly decreased after sub-zero air exposure  
335 in all three mussel categories (Fig. 1; Supplementary Table S3). Accordingly, the LLT<sub>50</sub> of intertidal  
336 *M. trossulus* was -7.53°C ± 0.26 CI, while the LLT<sub>50</sub> was -8.04°C ± 0.32 CI and -6.69°C ± 0.17 CI  
337 for subtidal *M. trossulus* and subtidal *M. galloprovincialis*, respectively. Thus, subtidal *M. trossulus*  
338 was the most freeze tolerant category under low pH conditions. It should be noted that only one *M.*  
339 *galloprovincialis* (6.66%) survived exposure to -8°C.

340

### 341 3.2 Metabolomics and fatty acids

342 We compared the composition of metabolites using PCA plots, which showed that the three mussels  
343 categories clustered together, suggesting no differentiation in their metabolic profiles (Supplementary  
344 Fig. S1). The predominate osmolytes were alanine, aspartate, betaine, glycine, malonate, taurine,  
345 trimethylamine and trimethylamine n-oxide (TMAO) (see Supplementary Table S4 for full list of all  
346 metabolites obtained from the <sup>1</sup>H NMR analysis), but we detected no significant changes in their  
347 concentration among the two pH treatments or mussel categories (Fig. 2). Likewise, were there no

348 significant differences in the concentration of any amino acids among mussel categories or pH  
349 treatment (Table 3). A metabolite-metabolite Pearson correlation analysis of the predominate  
350 osmolytes revealed that each mussel category had a unique metabolite-metabolite relationship under  
351 control pH conditions (Fig. 3 Upper panel). Low pH conditions changed the metabolite-metabolite  
352 relationship in all three mussel categories (Fig. 3 Lower panel); A marked shift from negative to  
353 positive correlations was observed across all metabolites in *M. trossulus* where the number of positive  
354 correlations increased by circa 53% in intertidal *M. trossulus* and 109% in subtidal *M. trossulus*. In  
355 *M. galloprovincialis*, the number of positive metabolite-metabolite correlations decreased from 11 to  
356 10 (Fig. 3).

357 Thirteen fatty acids contributed ~90% of the difference in membrane composition between the  
358 control and low pH treatment mussels (Table 2). While the fatty acid profiles in intertidal *M. trossulus*  
359 were unaffected by low pH exposure (Table 2; Fig. 4), the low pH treatment caused an increase in  
360 the amount of SFA and a decrease of PUFA in subtidal *M. galloprovincialis* and *M. trossulus* (Fig.  
361 4), which resulted in a significant decrease in the degree of unsaturation (GLMs;  $p < 0.05$ ; Table 2;  
362 Fig. 4). Accordingly, the unsaturation index (UI) was significantly higher in intertidal than subtidal  
363 *M. trossulus* after pH exposure (TukeyHSD,  $p = 0.0002$ ).

364

365

### 366 3.3 Seawater chemistry

367 Mean pH measurements from the hand-held pH meter showed relatively good agreement with our  
368 target acidified treatment ( $7.5 \text{ pH}_T \pm 0.03\text{-}0.06 \text{ s.d.}$ ), although there was a greater degree of variability  
369 in the control treatments ( $7.9 \text{ pH}_T \pm 0.12\text{-}0.19 \text{ s.d.}$ ) due to fluctuating ambient  $\text{pCO}_2$  (Table 1;  
370 Supplementary Fig. S2). There was also some disagreement between our measured  $\text{pH}_T$  and pH  
371 calculated using DIC and  $\text{pCO}_2$  data (Supplementary Table S5). The discrepancies in our control  
372 treatments were the result of the highly variable ambient  $\text{pCO}_2$  and the corresponding adjustments

373 we frequently made to our gas delivery system. On average, these fluctuations did not cause  
374 significant deviations from our target pH values, as shown by our hand-held pH<sub>T</sub> data (Table 1), but  
375 were more pronounced in the data taken from discrete, single time-point water samples. In all but one  
376 instance, the difference between directly measured and calculated pH for a single time point, i.e. the  
377 direct pH<sub>T</sub> measurement made at the time the discrete water sample was taken, was within the  
378 standard deviation of mean pH measurements taken over the two-week period. The regulation of OA  
379 simulation systems with potentiometric pH meters has been shown to be reliable (MacLeod et al.,  
380 2015), and therefore it is likely that the discrepancy between discrete and hand-held pH<sub>T</sub> data was not  
381 indicative of substantial deviations in seawater chemistry target values.

382 The addition of CO<sub>2</sub> free air to the controls also resulted in lower-than-expected pCO<sub>2</sub> values in both  
383 start and end point data from those treatments (Supplementary Table S1 and S5). We also observed  
384 some anomalous values for end point total alkalinity and DIC in our control treatment which were  
385 attributed to shell calcification and insufficient water replacement rates (Supplementary Table S1 and  
386 S5). These values were not indicative of the seawater chemistry parameters over the entire  
387 experimental period, as described above, but are included for completeness.

388

### 389 *3.4 Seawater chemistry variability*

390 In contrast to open oceans where pH is stable (Hofmann et al., 2011), daily and seasonal fluctuations  
391 can exceed 0.7 pH units in coastal ecosystems (Baumann et al., 2015; Hofmann et al., 2011;  
392 Menéndez et al., 2001; Santos et al., 2011; Semesi et al., 2009), where dense blue mussel beds have  
393 been found in areas characterized by  $\Omega_{\text{arag}} < 0.5$  (Duarte et al., 2020). Specifically, along the intertidal  
394 rocky shoreline of the Northwest Pacific, where mussels for this study was collected, pH values  
395 naturally decline below 7.6 (Ianson et al., 2016; Kroeker et al., 2016). Thus, while pH conditions in  
396 our aquariums fluctuated (control  $7.84 \pm 0.19$ – $7.92 \pm 0.12$  | acidified  $7.49 \pm 0.05$ – $7.55 \pm 0.03$ ), the



397 variability was within the range of *in situ* fluctuation rates. Our control conditions therefore represent  
398 actual *in situ* conditions, and the final average difference in pH between the control (7.88) and  
399 acidified (7.52) represented our target values (7.9 pH and 7.5 pH). The natural variation in coastal  
400 pH also challenges the common belief that  $\Omega_{\text{arag}}$  should be  $>1$  (non-corrosive conditions) to represent  
401 control conditions in OA experiments. Instead, we argue that control conditions should reflect actual  
402 pH levels on the site of collections, regardless of the  $\Omega_{\text{arag}}$  level. While we acknowledge that our  
403 regulation of seawater chemistry could be improved, we believe that changes in mussel survival were  
404 caused by changes in average pH, rather than variation in pH or other parameters. Our rationale is  
405 supported by the fact that intertidal mussels exhibited the largest decrease in survival upon exposure  
406 to reduced pH plus freezing, and as they are typically exposed to much greater variability in seawater  
407 chemistry and temperature than subtidal mussel populations, it is highly unlikely that variability had  
408 the most pronounced and negative affect on this group.

409

## 410 **Discussion**

411 Climate change is redistributing species towards cooler environments but understanding how  
412 different drivers interact to shape species distribution ranges is essential for predicting patterns and  
413 rates of change. At higher latitudes, expanding species face a suite of novel abiotic conditions  
414 including low temperatures, and a decreasing seawater pH (Fassbender et al., 2017). The goals of this  
415 study were to investigate the combined effect of low seawater pH and sub-zero air temperature stress  
416 on survival of two *Mytilus* spp. and compare the responses between a native and invasive congener.  
417 Intertidal individuals of the native bay mussel *M. trossulus* were significantly more freeze tolerant  
418 than subtidal *M. trossulus* individuals which were in turn more freeze tolerant than the invasive  
419 Mediterranean mussel *M. galloprovincialis*. Following exposure to acidified seawater, our data  
420 demonstrated a significant negative effect on freeze tolerance and survival across all species-habitat

421 combinations. Interestingly, the intertidal population of *M. trossulus* was most impacted by  
422 acidification, while subtidal *M. trossulus* was the least affected, becoming most freeze tolerant.  
423 Cellular accumulation of metabolites and reconfiguration of membrane fatty acids were uncorrelated  
424 with the observed variation in survival among mussel categories under both control and acidified  
425 conditions, which could be related to short term exposure. The homeoviscous adaptation related to  
426 the inverse relationship between the unsaturation index (UI) and acclimation temperature was mainly  
427 related to 22:6 $\omega$ 3 and 20:5 $\omega$ 3 levels (Pernet et al., 2007), thus the more than two time lower content  
428 of 22:6 $\omega$ 3 and 20:5 $\omega$ 3 in subtidal *M. trossulus* in low pH condition, could suggest that long term  
429 exposure to low pH decrease the cold acclimation capacity for this group of mussels. Although, we  
430 were unable to explain the observed variation in survival, we show that exposure to acidified water  
431 changed metabolite-metabolite associations in all three mussel categories, indicating that  
432 perturbations in seawater chemistry induce molecular alterations in these species.

433 Under present-day conditions (our control pH treatment), both the intertidal and subtidal *M. trossulus*  
434 category of the native *M. trossulus* were more freeze tolerant than the invasive *M. galloprovincialis*.  
435 This corresponds to their geographic distribution where *M. trossulus* predominantly inhabit  
436 shorelines at higher latitude where winter sub-zero air temperatures are common, while *M.*  
437 *galloprovincialis* dominate on warmer low latitude shores (Hilbish et al., 2000). However, the  
438 physiological processes behind inter- and intraspecific variation in freeze tolerance remains poorly  
439 understood. In *Mytilus* spp., the accumulation of intracellular low molecular weight osmolytes  
440 increases freeze tolerance (Kennedy et al., 2020, Williams, 1970), but the accumulation of these  
441 putative cryoprotectants can only partly explain survival after sub-zero temperature exposure. For  
442 example, although individuals of *M. trossulus* living in the upper intertidal zone are more freeze  
443 tolerant than individuals from the low zone, a recent study found no differences in the concentration  
444 of metabolites among the shore levels (Kennedy et al., 2020), and no differences in the concentration

445 of cryoprotectants were observed among our three mussel categories, despite large variation in freeze  
446 tolerance. Likewise, after ten days of exposure to acidified water that significantly reduced freeze  
447 tolerance in all three mussel categories, with the survival of the intertidal population most affected,  
448 the low pH exposure had no effect on metabolite concentration in any mussel category, offering no  
449 explanation for the observed decrease in freeze tolerance. The fact that the intertidal category was  
450 most affected by low pH support our notion that decreased survival was caused by changes in average  
451 pH, and not pH variation (see result section 3.4) because animals from more unstable environments  
452 (i.e. the intertidal) are generally more resilient to changing environmental conditions (Clark et al.,  
453 2018).

454 Another proposed driver of freeze tolerance is the composition of the membrane's phospholipid where  
455 a positive relationship between survival and membrane unsaturation state (i.e., higher number of  
456 double bonds in the membrane) has been shown in some species (Bindesbøl et al., 2005; Slotsbo et  
457 al., 2016). We hypothesized that freeze tolerance in *Mytilus* mussels would also be correlated to  
458 unsaturation state, but we observed no significant differences in UI among mussel categories under  
459 control pH conditions, and our data show that PUFA and UI in subtidal *M. trossulus* and *M.*  
460 *galloprovincialis* decreased in response to OA, yet they were the least affected in terms of freeze  
461 tolerance. Meanwhile, intertidal *M. trossulus* had the highest unsaturation stage, but the lowest  
462 survival. The phospholipid membrane composition changes have been regarded primarily as an  
463 adaptation related to seasonal temperature variability and at our knowledge only one study showed  
464 hourly membrane lipids restructuring related to temperature for a cyprinid fish (Carey and Hazel,  
465 1989). Our results support that phospholipid composition is of limited importance for freeze tolerance  
466 in *Mytilus* mussels, while membrane reconfiguration seems to be important for keeping membranes  
467 functional in cold water environments (Pernet et al., 2007; Thyrring et al., 2017c), thus membrane  
468 reconfiguration may be important for species to inhabit cold subtidal environments.

469 While we were unable to explain the variation in freeze tolerance under present-day and acidified  
470 conditions, variation in freeze tolerance among populations and congeners may be explained by high  
471 molecular weight cryoprotectants, e.g., ice binding proteins, not measured here. Indeed, the influence  
472 of antifreeze proteins on freeze tolerance in *Mytilus* ought to be explored further as their potential  
473 role seems to vary among populations (Box et al., 2022; Loomis, 1995). Furthermore, thermal  
474 tolerance variation may be explained at the gene level (Clark et al., 2021; Peck et al., 2015). A recent  
475 study highlighted that differences in the expression of heat shock genes and aquaporins plays a central  
476 role in determining freeze tolerance in northern barnacles species (Marshall et al., 2018), and heat  
477 shock proteins (HSPs) have been linked to sub-zero temperature survival in insects (Rinehart et al.,  
478 2007). Populations from variable environments (such as the intertidal zone or polar regions) are  
479 regularly exposed to unpredictable conditions, which can introduce a front-loading of stress genes  
480 that enable individuals to better cope with unfavorable conditions. For example, exposure to variable  
481 temperatures increases the overall thermal tolerance in the limpet *Lottia digitalis* (Drake et al., 2017),  
482 and studies have revealed animals from benign static environments are more vulnerable to  
483 unpredictable thermal stress (Marshall et al., 2021; Wang et al., 2020). Front-loading of genes is  
484 known from other marine species (Clark et al., 2008; Drake et al., 2017), and freeze tolerant *Mytilus*  
485 populations may also have front-loaded genes (e.g. HSPs, aquaporins) that are constantly at a higher  
486 expression level, which transfer into resilience through faster production of stress mediating proteins  
487 (Barshis et al., 2013). Thus, since the intertidal population of *M. trossulus* are used to daily air  
488 exposure, compared to subtidal *M. trossulus* and *M. galloprovincialis*, constantly increased gene  
489 expressions may provide an explanation to the difference observed in survival following sub-zero air  
490 exposure. Similarly, the subtidal *M. trossulus* mussels were collected in the Burrard Inlet, Vancouver,  
491 where the abiotic conditions are variable (Marshall et al., 2021). The exposure to these fluctuating  
492 abiotic conditions may also trigger a front-loading of relevant stress genes, and activate the cellular

493 stress response systems (i.e. activating stress proteins such as HSPs (Kültz, 2020)), pre-increasing  
494 tolerance to low pH exposure in subtidal *M. trossulus*. *Mytilus galloprovincialis* is known to express  
495 the stress regulating gene HSPA12 in response to stressful conditions (You et al., 2013). HSPA12  
496 belongs to the HSP70 family, and through a process of gene duplication, HSPA12 acquired subtly  
497 different functions, collectively working as a stress regulator (Clark et al., 2021). These stress  
498 regulators could, among other things, explain the limited effect of OA on freeze tolerance, and  
499 generally the capacity of *M. galloprovincialis* to establish in novel environments. The expression of  
500 HSPA12 as a thermal stress mediator was also recently demonstrated in *M. edulis* (Clark et al., 2021),  
501 and it is likely that *M. trossulus* also express this protective gene family. Still, intertidal *M. trossulus*  
502 may be the most affected by OA because intertidal species generally already live close to their  
503 physiological limits and have a limited capacity to adapt to new conditions. The large increase in  
504 mortality following low pH exposure may indicate that accommodating this additional environmental  
505 stressor exceeds their physiological ability to cope with external stressors. A molecular investigation  
506 could reveal the molecular processes behind variation in freeze tolerance among populations and  
507 species, and investigations into the underlying genetic mechanisms accounting for our observations  
508 would be interesting for future research.

509 Overall, *Mytilus* sp. are excellent at adapting to local environments (Riginos and Cunningham, 2005),  
510 making them highly stress tolerant and capable of enduring large ranges of salinities and temperatures  
511 (Barrett et al., 2022; Nielsen et al., 2021). Combined with a long pelagic larval period, they have a  
512 strong potential to invade new regions (Cárdenas et al., 2020; Thyrring et al., 2017b). This is the first  
513 study to investigate the effect of OA on freeze tolerance, an important trait necessary for a poleward  
514 shift in the intertidal zone. While intertidal *M. trossulus* populations are found as far north as northern  
515 Greenland (Mathiesen et al., 2017), the northern distribution limit of the invasive *M. galloprovincialis*  
516 in the Northwest Pacific is set around Canada. At their range edge in the waters of British Columbia,

517 Canada, subtidal populations face intense predation by seastars, excluding mussels from the subtidal  
518 and low intertidal (Harley, 2011). The near future pH scenario tested here (pH = 7.5) revealed that  
519 acidification weakens freeze tolerance across *Mytilus* spp. (LLT<sub>50</sub> ~ 7.38 – 7.53°C in intertidal *M.*  
520 *trossulus* and *M. galloprovincialis*), and since winter low tides predominantly occurs at nighttime in  
521 the Northwest Pacific, occasionally exposing sessile intertidal organisms to air temperatures down to  
522 -10°C (Kennedy et al., 2020), significant annual freeze mortality events could occur in both species  
523 inhabiting the intertidal if pH continues to decline. Thus, an ongoing poleward expansion in the  
524 intertidal (where predation is less intense) could be hindered, offsetting the poleward expanding  
525 facilitated by warmer waters. Consequently, if temperatures become too high for survival at a species  
526 equatorward edge, the combined effects of predation and limited freeze tolerance could result in a  
527 niche squeeze (rather than an expansion), substantially threatening persistence of this species in some  
528 regions.

529

### 530 **Data availability**

531 All data necessary for reproducing this work is freely available from the Borealis dataverse  
532 Repository (<https://borealisdata.ca>; DOI available upon acceptance).

533

### 534 **Declaration of competing interest**

535 The authors declare that they have no known competing financial interests or personal relationships  
536 that could have appeared to influence the work reported in this paper.

### 537 **Acknowledgements**

538 We would like to acknowledge the technical assistance and expertise of researchers at the Hakai  
539 Institute, Quadra Island, British Columbia, who conducted the chemical analysis of our discrete  
540 seawater samples, and Vancouver Aquarium and by the City of Vancouver for providing water and

541 transportation. This research has been supported by a Marie Skłodowska-Curie Individual Fellowship  
542 (IF) under contract number 797387, and by the Independent Research Fund Denmark (Danmarks Frie  
543 Forskningsfond) (DFF-International Postdoc; case no. 7027-00060B). The funding sources was not  
544 involved in designing the study design, in the collection, analysis and interpretation of data, in the  
545 writing of the report, or in the decision to submit the article for publication.

546

## 547 **References**

- 548 Barrett NJ, Thyrring J, Harper EM, Sejr MK, Sørensen JG, Peck LS, Clark MS. 2022. Molecular  
549 responses to thermal and osmotic stress in Arctic intertidal mussels (*Mytilus edulis*): The  
550 limits of resilience. *Genes*. 13. 155.  
551
- 552 Barshis DJ, Ladner JT, Oliver TA, Seneca FO, Traylor-Knowles N, Palumbi SR. 2013. Genomic  
553 basis for coral resilience to climate change. *Proceedings of the National Academy of  
554 Sciences*. 110. 1387-1392.  
555
- 556 Baumann H, Wallace RB, Tagliaferri T, Gobler CJ. 2015. Large natural pH, CO<sub>2</sub> and O<sub>2</sub>  
557 fluctuations in a temperate tidal salt marsh on diel, seasonal, and interannual time scales.  
558 *Estuaries and Coasts*. 38. 220-231.  
559
- 560 Bindesbøl AM, Holmstrup M, Damgaard C, Bayley M. 2005. Stress synergy between  
561 environmentally realistic levels of copper and frost in the earthworm *Dendrobaena  
562 octaedra*. *Environmental Toxicology and Chemistry*. 24. 1462-7.  
563
- 564 Box ICH, Matthews BJ, Marshall KE. 2022. Molecular evidence of intertidal habitats selecting for  
565 repeated ice-binding protein evolution in invertebrates. *Journal of Experimental Biology*.  
566 225. jeb243409.  
567
- 568 Brown NEM, Milazzo M, Rastrick SPS, Hall-Spencer JM, Therriault TW, Harley CDG. 2018.  
569 Natural acidification changes the timing and rate of succession, alters community structure,  
570 and increases homogeneity in marine biofouling communities. *Global Change Biology*. 24.  
571 e112-e127.  
572
- 573 Cappello T, Mauceri A, Corsaro C, Maisano M, Parrino V, Lo Paro G, Messina G, Fasulo S. 2013.  
574 Impact of environmental pollution on caged mussels *Mytilus galloprovincialis* using NMR-  
575 based metabolomics. *Marine Pollution Bulletin*. 77. 132-139.  
576
- 577 Cárdenas L, Leclerc J-C, Bruning P, Garrido I, Détrée C, Figueroa A, Astorga M, Navarro JM,  
578 Johnson LE, Carlton JT, Pardo L. 2020. First mussel settlement observed in Antarctica  
579 reveals the potential for future invasions. *Scientific Reports*. 10. 5552.  
580

- 581 Carey C, Hazel JR. 1989. Diurnal variation in membrane lipid composition of sonoran desert  
582 teleosts. *Journal of Experimental Biology*. 147. 375-391.  
583
- 584 Clark MS, Geissler P, Waller C, Fraser KPP, Barnes DKA, Peck LS. 2008. Low heat-shock  
585 thresholds in wild Antarctic inter-tidal limpets (*Nacella concinna*). *Cell stress & chaperones*.  
586 13. 51-58.  
587
- 588 Clark MS, Peck LS, Thyrring J. 2021. Resilience in Greenland intertidal *Mytilus*: The hidden stress  
589 defense. *Science of the Total Environment*. 767. 144366.  
590
- 591 Clark MS, Thorne MAS, King M, Hipperson H, Hoffman JI, Peck LS. 2018. Life in the intertidal:  
592 Cellular responses, methylation and epigenetics. *Functional Ecology*. 32. 1982-1994.  
593
- 594 Deere JA, Sinclair BJ, Marshall DJ, Chown SL. 2006. Phenotypic plasticity of thermal tolerances in  
595 five oribatid mite species from sub-Antarctic Marion Island. *J Insect Physiol*. 52. 693-700.  
596
- 597 Drake MJ, Miller NA, Todgham AE. 2017. The role of stochastic thermal environments in  
598 modulating the thermal physiology of an intertidal limpet, *Lottia digitalis*. *Journal of*  
599 *Experimental Biology*. 220. 3072-3083.  
600
- 601 Duarte CM, Rodriguez-Navarro AB, Delgado-Huertas A, Krause-Jensen D. 2020. Dense *Mytilus*  
602 beds along freshwater-influenced Greenland shores: Resistance to corrosive waters under  
603 high food supply. *Estuaries and Coasts*. 43. 387-395.  
604
- 605 Evans W, Pocock K, Hare A, Weekes C, Hales B, Jackson J, Gurney-Smith H, Mathis JT, Alin SR,  
606 Feely RA. 2019. Marine CO<sub>2</sub> patterns in the Northern Salish Sea. *Frontiers in Marine*  
607 *Science*. 5.  
608
- 609 Fassbender AJ, Sabine CL, Palevsky HI. 2017. Nonuniform ocean acidification and attenuation of  
610 the ocean carbon sink. *Geophysical Research Letters*. 44. 8404-8413.  
611
- 612 Fossheim M, Primicerio R, Johannesen E, Ingvaldsen RB, Aschan MM, Dolgov AV. 2015. Recent  
613 warming leads to a rapid borealization of fish communities in the Arctic. *Nature Climate*  
614 *Change*. 5. 673-677.  
615
- 616 Franzova VA, MacLeod CD, Wang T, Harley CDG. 2019. Complex and interactive effects of ocean  
617 acidification and warming on the life span of a marine trematode parasite. *International*  
618 *Journal of Parasitology*. 49. 1015-1021.  
619
- 620 Harley CDG. 2011. Climate change, keystone predation, and biodiversity loss. *Science*. 334. 1124-  
621 1127.
- 622 Harvey BP, Gwynn-Jones D, Moore PJ. 2013. Meta-analysis reveals complex marine biological  
623 responses to the interactive effects of ocean acidification and warming. *Ecology and*  
624 *evolution*. 3. 1016-1030.  
625
- 626 Hazel JR. 1995. Thermal adaptation in biological membranes: Is homeoviscous adaptation the  
627 explanation? *Annual Review of Physiology*. 57. 19-42.



- 628 Hilbish TJ, Mullinax A, Dolven SI, Meyer A, Koehn RK, Rawson PD. 2000. Origin of the  
629 antitropical distribution pattern in marine mussels (*Mytilus* spp.): routes and timing of  
630 transequatorial migration. *Marine Biology*. 136. 69-77.  
631
- 632 Hofmann GE, Smith JE, Johnson KS, Send U, Levin LA, Micheli F, Paytan A, Price NN, Peterson  
633 B, Takeshita Y, Matson PG, Crook ED, Kroeker KJ, Gambi MC, Rivest EB, Frieder CA,  
634 Yu PC, Martz TR. 2011. High-frequency dynamics of ocean pH: A multi-ecosystem  
635 comparison. *PLOS ONE*. 6. e28983.  
636
- 637 Hönisch B, Ridgwell A, Schmidt DN, Thomas E, Gibbs SJ, Sluijs A, Zeebe R, Kump L, Martindale  
638 RC, Greene SE, Kiessling W, Ries J, Zachos JC, Royer DL, Barker S, Marchitto TM, Moyer  
639 R, Pelejero C, Ziveri P, Foster GL, Williams B. 2012. The geological record of ocean  
640 acidification. *Science*. 335. 1058-1063.  
641
- 642 Ianson D, Allen SE, Moore-Maley BL, Johannessen SC, Macdonald, W. R. 2016. Vulnerability of a  
643 semienclosed estuarine sea to ocean acidification in contrast with hypoxia. *Geophysical  
644 Research Letters*. 43. 5793-5801.  
645
- 646 Jahagirdar S, Saccenti E. 2020. On the use of correlation and MI as a measure of metabolite-  
647 metabolite association for network differential connectivity analysis. *Metabolites*. 10.  
648
- 649 Kennedy JR, Harley CDG, Marshall KE. 2020. Drivers of plasticity in freeze tolerance in the  
650 intertidal mussel *Mytilus trossulus*. *Journal of Experimental Biology*. 223.  
651
- 652 Kortsch S, Primicerio R, Beuchel F, Renaud PE, Rodrigues J, Lønne OJ, Gulliksen B. 2012.  
653 Climate-driven regime shifts in Arctic marine benthos. *Proceedings of the National  
654 Academy of Sciences*. 109. 14052-14057.  
655
- 656 Kroeker KJ, Kordas RL, Crim RN, Singh GG. 2010. Meta-analysis reveals negative yet variable  
657 effects of ocean acidification on marine organisms. *Ecology Letters*. 13. 1419-1434.  
658
- 659 Kroeker KJ, Sanford E, Rose JM, Blanchette CA, Chan F, Chavez FP, Gaylord B, Helmuth B, Hill  
660 TM, Hofmann GE, McManus MA, Menge BA, Nielsen KJ, Raimondi PT, Russell AD,  
661 Washburn L. 2016. Interacting environmental mosaics drive geographic variation in mussel  
662 performance and predation vulnerability. *Ecology Letters*. 19. 771-779.  
663
- 664 Kültz D. 2020. Evolution of cellular stress response mechanisms. *Journal of Experimental Zoology  
665 Part A: Ecological and Integrative Physiology*. 333. 359-378.  
666
- 667 Lim EG, Harley CDG. 2018. Caprellid amphipods (*Caprella* spp.) are vulnerable to both  
668 physiological and habitat-mediated effects of ocean acidification. *PeerJ*. 6. e5327.  
669
- 670 Loomis SH. 1995. Freezing tolerance of marine invertebrates. *Oceanography and marine biology*.  
671 33. 337-350.  
672
- 673 Loomis SH, Carpenter JF, Crowe JH. 1988. Identification of strombine and taurine as  
674 cryoprotectants in the intertidal bivalve *Mytilus edulis*. *Biochimica et Biophysica Acta -  
675 Biomembranes*. 943. 113-118.

- 676 MacLeod CD, Doyle HL, Currie KI. 2015. Technical Note: Maximising accuracy and minimising  
677 cost of a potentiometrically regulated ocean acidification simulation system.  
678 Biogeosciences. 12. 713-721.  
679
- 680 MacLeod CD, Poulin R. 2015. Interactive effects of parasitic infection and ocean acidification on  
681 the calcification of a marine gastropod. Marine Ecology Progress Series. 537. 137-150.  
682
- 683 Marshall KE, Anderson KM, Brown NEM, Dytneriski JK, Flynn KL, Bernhardt JR, Konecny CA,  
684 Gurney-Smith H, Harley CDG. 2021. Whole-organism responses to constant temperatures  
685 do not predict responses to variable temperatures in the ecosystem engineer *Mytilus*  
686 *trossulus*. Proceedings of the Royal Society - Biological sciences. 288. 20202968.  
687
- 688 Marshall KE, Dowle EJ, Petrunina A, Kolbasov G, Chan BKK. 2018. Transcriptional dynamics  
689 following freezing stress reveal selection for mechanisms of freeze tolerance at the poleward  
690 range margin in the cold water intertidal barnacle *Semibalanus balanoides*. bioRxiv.  
691 449330.  
692
- 693 Marty Y, Delaunay F, Moal J, Samain JF. 1992. Changes in the fatty acid composition of *Pecten*  
694 *maximus* (L.) during larval development. Journal of Experimental Marine Biology and  
695 Ecology. 163. 221-234.  
696
- 697 Mathiesen SS, Thyrring J, Hemmer-Hansen J, Berge J, Sukhotin A, Leopold P, Bekaert M, Sejr  
698 MK, Nielsen EE. 2017. Genetic diversity and connectivity within *Mytilus* spp. in the  
699 subarctic and Arctic. Evolutionary Applications. 10. 39-55.  
700
- 701 Menéndez M, Martínez M, Comín FA. 2001. A comparative study of the effect of pH and inorganic  
702 carbon resources on the photosynthesis of three floating macroalgae species of a  
703 Mediterranean coastal lagoon. Journal of Experimental Marine Biology and Ecology. 256.  
704 123-136.  
705
- 706 Meryman HT. 1971. Osmotic stress as a mechanism of freezing injury. Cryobiology. 8. 489-500.  
707
- 708 Nagelkerken I, Munday PL. 2016. Animal behaviour shapes the ecological effects of ocean  
709 acidification and warming: moving from individual to community-level responses. Global  
710 Change Biology. 22. 974-989.  
711
- 712 Nielsen MB, Vogensen TK, Thyrring J, Sørensen JG, Sejr MK. 2021. Freshening increases the  
713 susceptibility to heat stress in intertidal mussels (*Mytilus edulis*) from the Arctic. Journal of  
714 Animal Ecology. 90. 1515-1524.  
715
- 716 Parrish CC. Determination of Total Lipid, Lipid Classes, and Fatty Acids in Aquatic Samples. In:  
717 Arts MT, Wainman BC, editors. Lipids in Freshwater Ecosystems. Springer New York,  
718 New York, NY, 1999, pp. 4-20.  
719
- 720 Peck LS, Thorne MA, Hoffman JI, Morley SA, Clark MS. 2015. Variability among individuals is  
721 generated at the gene expression level. Ecology. 96. 2004-14.  
722

- 723 Pernet F, Tremblay Rj, Comeau L, Guderley H. 2007. Temperature adaptation in two bivalve  
724 species from different thermal habitats: energetics and remodelling of membrane lipids.  
725 Journal of Experimental Biology. 210. 2999-3014.  
726
- 727 Reid HB, Harley CDG. 2021. Low temperature exposure determines performance and thermal  
728 microhabitat use in an intertidal gastropod (*Littorina scutulata*) during the winter. Marine  
729 Ecology Progress Series. 660. 105-118.  
730
- 731 Riginos C, Cunningham CW. 2005. Local adaptation and species segregation in two mussel  
732 (*Mytilus edulis* x *Mytilus trossulus*) hybrid zones. Molecular Ecology. 14. 381-400.  
733
- 734 Rinehart JP, Li A, Yocum GD, Robich RM, Hayward SAL, Denlinger DL. 2007. Up-regulation of  
735 heat shock proteins is essential for cold survival during insect diapause. Proceedings of the  
736 National Academy of Sciences. 104. 11130-11137.  
737
- 738 Santos IR, Glud RN, Maher D, Erler D, Eyre BD. 2011. Diel coral reef acidification driven by  
739 porewater advection in permeable carbonate sands, Heron Island, Great Barrier Reef.  
740 Geophysical Research Letters. 38.  
741
- 742 Scrosati R, Eckersley LK. 2007. Thermal insulation of the intertidal zone by the ice foot. Journal of  
743 Sea Research. 58. 331-334.  
744
- 745 Sejr MK, Mouritsen KN, Krause-Jensen D, Olesen B, Blicher ME, Thyrring J. 2021. Small scale  
746 factors modify impacts of temperature, ice scour and waves and drive rocky intertidal  
747 community structure in a Greenland fjord. Frontiers in Marine Science. 7.  
748
- 749 Semesi IS, Beer S, Björk M. 2009. Seagrass photosynthesis controls rates of calcification and  
750 photosynthesis of calcareous macroalgae in a tropical seagrass meadow. Marine Ecology  
751 Progress Series. 382. 41-47.  
752
- 753 Slotsbo S, Sørensen JG, Holmstrup M, Kostal V, Kellermann V, Overgaard J. 2016. Tropical to  
754 subpolar gradient in phospholipid composition suggests adaptive tuning of biological  
755 membrane function in drosophilids. Functional Ecology. 30. 759-768.  
756
- 757 Storey KB, Storey JM. 1988. Freeze tolerance in animals. Physiological Reviews. 68. 27-84.  
758
- 759 Storey KB, Storey JM. 1996. Natural freezing survival in animals. Annual Review of Ecology and  
760 Systematics. 27. 365-386.  
761
- 762 Sunday JM, Bates AE, Dulvy NK. 2012. Thermal tolerance and the global redistribution of animals.  
763 Nature Climate Change. 2. 686-690.  
764
- 765 Telesca L, Peck LS, Sanders T, Thyrring J, Sejr MK, Harper EM. 2019. Biomineralization plasticity  
766 and environmental heterogeneity predict geographical resilience patterns of foundation  
767 species to future change. Glob Chang Biol. 25. 4179-4193.  
768

- 769 Thyrring J, Blicher ME, Sørensen JG, Wegeberg S, Sejr MK. 2017a. Rising air temperatures will  
770 increase intertidal mussel abundance in the Arctic. *Marine Ecology Progress Series*. 584. 91-  
771 104.  
772
- 773 Thyrring J, Jensen KT, Sejr MK. 2017b. Gametogenesis of an intertidal population of *Mytilus*  
774 *trossulus* in NW Greenland: not a limitation for potential Arctic range expansion. *Marine*  
775 *Ecology Progress Series*. 574. 65-74.  
776
- 777 Thyrring J, Juhl BK, Holmstrup M, Blicher ME, Sejr MK. 2015. Does acute lead (Pb)  
778 contamination influence membrane fatty acid composition and freeze tolerance in intertidal  
779 blue mussels in arctic Greenland? *Ecotoxicology*. 24. 2036-42.  
780
- 781 Thyrring J, Tremblay R, Sejr MK. 2017c. Importance of ice algae and pelagic phytoplankton as  
782 food sources revealed by fatty acid trophic markers in a keystone species (*Mytilus trossulus*)  
783 from the High Arctic. *Marine Ecology Progress Series*. 572. 155-164.  
784
- 785 Thyrring J, Tremblay R, Sejr MK. 2019. Local cold adaption increases the thermal window of  
786 temperate mussels in the Arctic. *Conservation Physiology*. 7. coz098.  
787
- 788 Toxopeus J, Sinclair BJ. 2018. Mechanisms underlying insect freeze tolerance. *Biological Reviews*.  
789 93. 1891-1914.  
790
- 791 van Heuven S, Pierrot D, Rae J, Lewis E, Wallace DWR. 2011. CO2SYS v 1.1, MATLAB program  
792 developed for CO2 system calculations. ORNL/CDIAC-105b. Carbon Dioxide Information  
793 Analysis Center, Oak Ridge National Laboratory, U.S. DoE, Oak Ridge, TN.  
794
- 795 Wang J, Peng X, Dong Y. 2020. High abundance and reproductive output of an intertidal limpet  
796 (*Siphonaria japonica*) in environments with high thermal predictability. *Marine Life*  
797 *Science & Technology*. 2. 324-333.  
798
- 799 Wernberg T, Bennett S, Babcock RC, Bettignies Td, Cure K, Depczynski M, Dufois F, Fromont J,  
800 Fulton CJ, Hovey RK, Harvey ES, Holmes TH, Kendrick GA, Radford B, Santana-Garcon  
801 J, Saunders BJ, Smale DA, Thomsen MS, Tuckett CA, Tuya F, Vanderklift MA, Wilson S.  
802 2016. Climate-driven regime shift of a temperate marine ecosystem. *Science*. 353. 169-172.  
803
- 804 Williams E, Somero G. 1996. Seasonal-, tidal-cycle- and microhabitat-related variation in  
805 membrane order of phospholipid vesicles from gills of the intertidal mussel *Mytilus*  
806 *californianus*. *Journal of Experimental Biology*. 199. 1587-96.  
807
- 808 Wishart DS, Feunang YD, Marcu A, Guo AC, Liang K, Vázquez-Fresno R, Sajed T, Johnson D, Li  
809 C, Karu N, Sayeeda Z, Lo E, Assempour N, Berjanskii M, Singhal S, Arndt D, Liang Y,  
810 Badran H, Grant J, Serra-Cayuela A, Liu Y, Mandal R, Neveu V, Pon A, Knox C, Wilson  
811 M, Manach C, Scalbert A. 2018. HMDB 4.0: the human metabolome database for 2018.  
812 *Nucleic acids research*. 46. D608-D617.  
813
- 814 Wittmann AC, Pörtner H-O. 2013. Sensitivities of extant animal taxa to ocean acidification. *Nature*  
815 *Climate Change*. 3. 995-1001.  
816

817 You L, Ning X, Liu F, Zhao J, Wang Q, Wu H. 2013. The response profiles of HSPA12A and  
818 TCTP from *Mytilus galloprovincialis* to pathogen and cadmium challenge. *Fish and*  
819 *Shellfish Immunology*. 35. 343-50.

820 Zhao X, Han Y, Chen B, Xia B, Qu K, Liu G. 2020. CO<sub>2</sub>-driven ocean acidification weakens  
821 mussel shell defense capacity and induces global molecular compensatory responses.  
822 *Chemosphere*. 243. 125415.

823

824 Zuur AF, Ieno EN. 2016. A protocol for conducting and presenting results of regression-type  
825 analyses. *Methods in Ecology and Evolution*. 7. 636-645.

826

827 Zuur AF, Ieno EN, Elphick CS. 2010. A protocol for data exploration to avoid common statistical  
828 problems. *Methods in Ecology and Evolution*. 1. 3-14.

829

### 830 **Figure captions**

831

832 **Figure 1:** Proportion survival in intertidal *Mytilus trossulus*, subtidal *M. trossulus* and subtidal *M.*

833 *galloprovincialis* after subjection to two pH treatments for 10 days and seven sub-zero air

834 temperatures. Lines indicate fitted logistic regression models; Solid black line represent control

835 conditions (pH =7.9) and dashed blue line represent acidified conditions (pH =7.5). Dots represent

836 actual survival and shades areas indicate 95% confidence intervals of the fitted model.

837

838 **Figure 2:** The concentration of common gill tissue osmolytes in intertidal *Mytilus trossulus*, subtidal

839 *M. trossulus* and subtidal *M. galloprovincialis* after subjection to control (pH = 7.9) and acidified (pH

840 = 7.5) conditions (n = 5). The horizontal line in each boxplot is the median, the boxes define the

841 hinges (25–75% quartile) and the whisker is 1.5 times the hinges. Black dots represent data outside

842 this range.

843

844 **Figure 3:** Metabolite-metabolite correlation analysis of gill tissue in intertidal *Mytilus trossulus*,

845 subtidal *M. trossulus* and subtidal *M. galloprovincialis*. Upper panel: metabolite associations after

846 subjection to the control (pH = 7.9) conditions. Lower panel: metabolite associations after subjection

847 to the acidified (pH = 7.5) conditions. Positive correlations are shown in blue; negative correlations  
848 are shown in red.

849 **Figure 4:** The molar percentage of saturated fatty acids (SFA), monounsaturated fatty acids (MUFA),  
850 polyunsaturated fatty acids (PUFA) of gill tissue in intertidal *Mytilus trossulus*, subtidal *M. trossulus*  
851 and subtidal *M. galloprovincialis* after subjection to control (pH = 7.9) and acidified (pH = 7.5)  
852 conditions (n = 5). The horizontal line in each boxplot is the median, the boxes define the hinges (25–  
853 75% quartile) and the whisker is 1.5 times the hinges. Black dots represent data outside this range.

854

## 855 Tables

856 **Table 1:** Mean ( $\pm$  standard deviation) pH<sub>T</sub> and temperature measured directly in aquaria in each  
857 incubator.

| Incubator   | Control         |                 |                 | Acidified       |                 |                 |
|-------------|-----------------|-----------------|-----------------|-----------------|-----------------|-----------------|
|             | 1               | 2               | 3               | 4               | 5               | 6               |
| pH          | 7.84 $\pm$ 0.19 | 7.92 $\pm$ 0.12 | 7.87 $\pm$ 0.13 | 7.55 $\pm$ 0.03 | 7.49 $\pm$ 0.05 | 7.51 $\pm$ 0.06 |
| Temperature | 6.67 $\pm$ 0.27 | 6.95 $\pm$ 0.36 | 6.86 $\pm$ 0.19 | 7.17 $\pm$ 0.26 | 7.08 $\pm$ 0.54 | 6.89 $\pm$ 0.13 |

858

859

860

861

862 **Table 2:** Mean percentage ( $\pm$  standard deviation) of 13 fatty acids contributing ~90% of the  
863 differences in fatty acid composition after subjection to control (pH = 7.9) and acidified (pH = 7.5)  
864 conditions (n = 5). UI = unsaturation index. Bold numbers indicate significant differences among the  
865 control and low pH treatment within a mussel category (p < 0.05).

| Fatty acid                      | Intertidal - <i>M. trossulus</i> |                 | Subtidal - <i>M. trossulus</i>  |                                 | Subtidal - <i>M. galloprovincialis</i> |                                 |
|---------------------------------|----------------------------------|-----------------|---------------------------------|---------------------------------|----------------------------------------|---------------------------------|
|                                 | Acidified                        | Control         | Acidified                       | Control                         | Acidified                              | Control                         |
| 16:0                            | 9.53 $\pm$ 0.89                  | 8.72 $\pm$ 1.21 | 16.56 $\pm$ 6.62                | 10.21 $\pm$ 1.21                | 12.95 $\pm$ 5.17                       | 8.83 $\pm$ 1.44                 |
| 18:0                            | 2.57 $\pm$ 0.34                  | 2.53 $\pm$ 0.17 | 4.30 $\pm$ 1.98                 | 2.28 $\pm$ 0.38                 | 3.38 $\pm$ 1.26                        | 2.53 $\pm$ 0.67                 |
| <b>16:1<math>\omega</math>7</b> | 1.01 $\pm$ 0.1                   | 1.2 $\pm$ 0.22  | <b>1.58<math>\pm</math>0.33</b> | <b>0.97<math>\pm</math>0.19</b> | <b>1.71<math>\pm</math>0.33</b>        | <b>1.07<math>\pm</math>0.27</b> |
| 17:1 $\omega$ 7                 | 1.71 $\pm$ 0.63                  | 4.07 $\pm$ 4.16 | 1.94 $\pm$ 1.14                 | 1.43 $\pm$ 1.1                  | 2.26 $\pm$ 1.63                        | 2.04 $\pm$ 2.15                 |
| <b>18:1<math>\omega</math>7</b> | 1.48 $\pm$ 0.12                  | 1.37 $\pm$ 0.37 | <b>1.91<math>\pm</math>0.52</b> | <b>1.21<math>\pm</math>0.2</b>  | 2.08 $\pm$ 0.58                        | 1.5 $\pm$ 0.34                  |
| <b>20:1<math>\omega</math>9</b> | 4.31 $\pm$ 0.3                   | 4.12 $\pm$ 0.46 | <b>6.21<math>\pm</math>1.13</b> | <b>4.86<math>\pm</math>0.61</b> | 5.43 $\pm$ 1.32                        | 4.37 $\pm$ 0.48                 |

|                                 |                   |                   |                                    |                                   |                                    |                                   |
|---------------------------------|-------------------|-------------------|------------------------------------|-----------------------------------|------------------------------------|-----------------------------------|
| 18:2 $\omega$ 6                 | 0.91 $\pm$ 0.1    | 0.94 $\pm$ 0.35   | 1.46 $\pm$ 0.67                    | 1.31 $\pm$ 0.25                   | 0.79 $\pm$ 0.36                    | 0.64 $\pm$ 0.14                   |
| 18:3 $\omega$ 3                 | 1.12 $\pm$ 0.07   | 1.21 $\pm$ 0.5    | 1.04 $\pm$ 0.57                    | 1.52 $\pm$ 0.19                   | 0.31 $\pm$ 0.1                     | 0.36 $\pm$ 0.09                   |
| <b>20:2</b>                     | 9.41 $\pm$ 0.76   | 8.82 $\pm$ 1.05   | <b>11.96<math>\pm</math>1.21</b>   | <b>9.87<math>\pm</math>0.58</b>   | 9.78 $\pm$ 1.79                    | 8.67 $\pm$ 1.41                   |
| 20:4 $\omega$ 6                 | 9.70 $\pm$ 1.1    | 9.81 $\pm$ 0.9    | 3.76 $\pm$ 2.61                    | 6.07 $\pm$ 0.76                   | 6.95 $\pm$ 2.43                    | 9.7 $\pm$ 1.37                    |
| <b>20:5<math>\omega</math>3</b> | 9.78 $\pm$ 1.15   | 10.74 $\pm$ 1.97  | <b>4.87<math>\pm</math>3.59</b>    | <b>12.19<math>\pm</math>1.05</b>  | 7.0 $\pm$ 2.98                     | 10.21 $\pm$ 1.68                  |
| <b>22:2-NMI</b>                 | 11.54 $\pm$ 0.84  | 10.86 $\pm$ 1.5   | <b>12.72<math>\pm</math>0.95</b>   | <b>9.55<math>\pm</math>0.66</b>   | 13.53 $\pm$ 1.5                    | 12.19 $\pm$ 1.14                  |
| <b>22:6<math>\omega</math>3</b> | 14.13 $\pm$ 0.99  | 13.73 $\pm$ 0.69  | <b>6.36<math>\pm</math>4.86</b>    | <b>16.22<math>\pm</math>0.48</b>  | <b>9.7<math>\pm</math>4.61</b>     | <b>15.88<math>\pm</math>2.06</b>  |
| <b>UI</b>                       | 234.73 $\pm$ 6.14 | 238.84 $\pm$ 8.75 | <b>150.94<math>\pm</math>55.19</b> | <b>244.97<math>\pm</math>4.59</b> | <b>187.59<math>\pm</math>46.35</b> | <b>242.92<math>\pm</math>8.78</b> |

866

867

868

869

870

871 **Table 3:** Mean ( $\pm$  standard deviation) amino acid composition (% total amino acid content) of gill

872 tissue in intertidal *Mytilus trossulus*, subtidal *M. trossulus* and subtidal *M. galloprovincialis* after

873 subjection to control (pH = 7.9) and acidified (pH = 7.5) conditions (n = 5)

874

| Amino acid | Intertidal - <i>M. trossulus</i> |                  | Subtidal - <i>M. trossulus</i> |                  | Subtidal - <i>M. galloprovincialis</i> |                  |
|------------|----------------------------------|------------------|--------------------------------|------------------|----------------------------------------|------------------|
|            | Acidified                        | Control          | Acidified                      | Control          | Acidified                              | Control          |
| Asx        | 11.18 $\pm$ 0.44                 | 11.39 $\pm$ 0.25 | 11.07 $\pm$ 0.30               | 11.34 $\pm$ 0.86 | 11.07 $\pm$ 0.30                       | 11.01 $\pm$ 0.33 |
| Ala        | 5.50 $\pm$ 0.22                  | 5.74 $\pm$ 0.35  | 5.54 $\pm$ 0.21                | 5.47 $\pm$ 0.33  | 5.54 $\pm$ 0.21                        | 5.56 $\pm$ 0.13  |
| Arg        | 7.92 $\pm$ 0.85                  | 7.11 $\pm$ 0.10  | 7.07 $\pm$ 0.07                | 7.08 $\pm$ 0.11  | 7.07 $\pm$ 0.07                        | 7.22 $\pm$ 0.19  |
| Glx        | 14.08 $\pm$ 0.99                 | 14.97 $\pm$ 0.16 | 15.07 $\pm$ 0.12               | 14.81 $\pm$ 0.46 | 15.07 $\pm$ 0.12                       | 14.97 $\pm$ 0.17 |
| Gly        | 9.37 $\pm$ 0.91                  | 9.15 $\pm$ 0.62  | 9.15 $\pm$ 0.61                | 9.39 $\pm$ 1.43  | 9.15 $\pm$ 0.61                        | 9.31 $\pm$ 0.7   |
| His        | 2.03 $\pm$ 0.04                  | 2.15 $\pm$ 0.12  | 2.04 $\pm$ 0.07                | 2.09 $\pm$ 0.10  | 2.04 $\pm$ 0.07                        | 2.05 $\pm$ 0.05  |
| Ile        | 4.16 $\pm$ 0.18                  | 4.14 $\pm$ 0.09  | 4.03 $\pm$ 0.16                | 4.10 $\pm$ 0.26  | 4.03 $\pm$ 0.16                        | 3.97 $\pm$ 0.19  |
| L-Dopa     | 0.14 $\pm$ 0.01                  | 0.17 $\pm$ 0.02  | 0.09 $\pm$ 0.01                | 0.14 $\pm$ 0.03  | 0.09 $\pm$ 0.01                        | 0.11 $\pm$ 0.01  |
| Leu        | 6.49 $\pm$ 0.18                  | 6.53 $\pm$ 0.09  | 6.30 $\pm$ 0.25                | 6.42 $\pm$ 0.34  | 6.30 $\pm$ 0.25                        | 6.3 $\pm$ 0.3    |
| Lys        | 7.65 $\pm$ 1.60                  | 7.06 $\pm$ 0.33  | 6.51 $\pm$ 0.37                | 6.69 $\pm$ 1.16  | 6.51 $\pm$ 0.37                        | 6.47 $\pm$ 0.36  |
| Met        | 2.55 $\pm$ 0.12                  | 2.60 $\pm$ 0.08  | 2.76 $\pm$ 0.05                | 2.64 $\pm$ 0.10  | 2.76 $\pm$ 0.05                        | 2.68 $\pm$ 0.08  |
| Phe        | 4.26 $\pm$ 0.19                  | 4.36 $\pm$ 0.12  | 4.16 $\pm$ 0.15                | 4.31 $\pm$ 0.44  | 4.16 $\pm$ 0.15                        | 4.08 $\pm$ 0.18  |
| Pro        | 5.25 $\pm$ 0.48                  | 5.26 $\pm$ 0.27  | 5.92 $\pm$ 0.31                | 5.59 $\pm$ 0.61  | 5.92 $\pm$ 0.31                        | 6.03 $\pm$ 0.24  |
| Ser        | 5.06 $\pm$ 0.21                  | 4.85 $\pm$ 0.15  | 4.81 $\pm$ 0.10                | 4.87 $\pm$ 0.14  | 4.81 $\pm$ 0.10                        | 4.77 $\pm$ 0.1   |
| Thr        | 4.36 $\pm$ 0.16                  | 4.38 $\pm$ 0.04  | 4.72 $\pm$ 0.07                | 4.50 $\pm$ 0.13  | 4.72 $\pm$ 0.07                        | 4.75 $\pm$ 0.05  |
| Tyr        | 5.12 $\pm$ 0.47                  | 5.25 $\pm$ 0.28  | 5.62 $\pm$ 0.10                | 5.55 $\pm$ 0.44  | 5.62 $\pm$ 0.10                        | 5.63 $\pm$ 0.15  |
| Val        | 5.03 $\pm$ 0.24                  | 5.06 $\pm$ 0.11  | 5.22 $\pm$ 0.10                | 5.13 $\pm$ 0.11  | 5.22 $\pm$ 0.10                        | 5.21 $\pm$ 0.08  |

875 Abbreviations: Asx, aspartic acid/asparginine; Ala, alanine; Arg, arginine; Glx, glutamic acid/glutamine; Gly, glycine; His, histidine;  
876 Ile, isoleucine; Leu, leucine; Lys, lysine; Met, methionine; Phe, phenylalanine; Pro, proline; Ser, serine; Thr, threonine; Tyr, tyrosine;  
877 Val, valine.





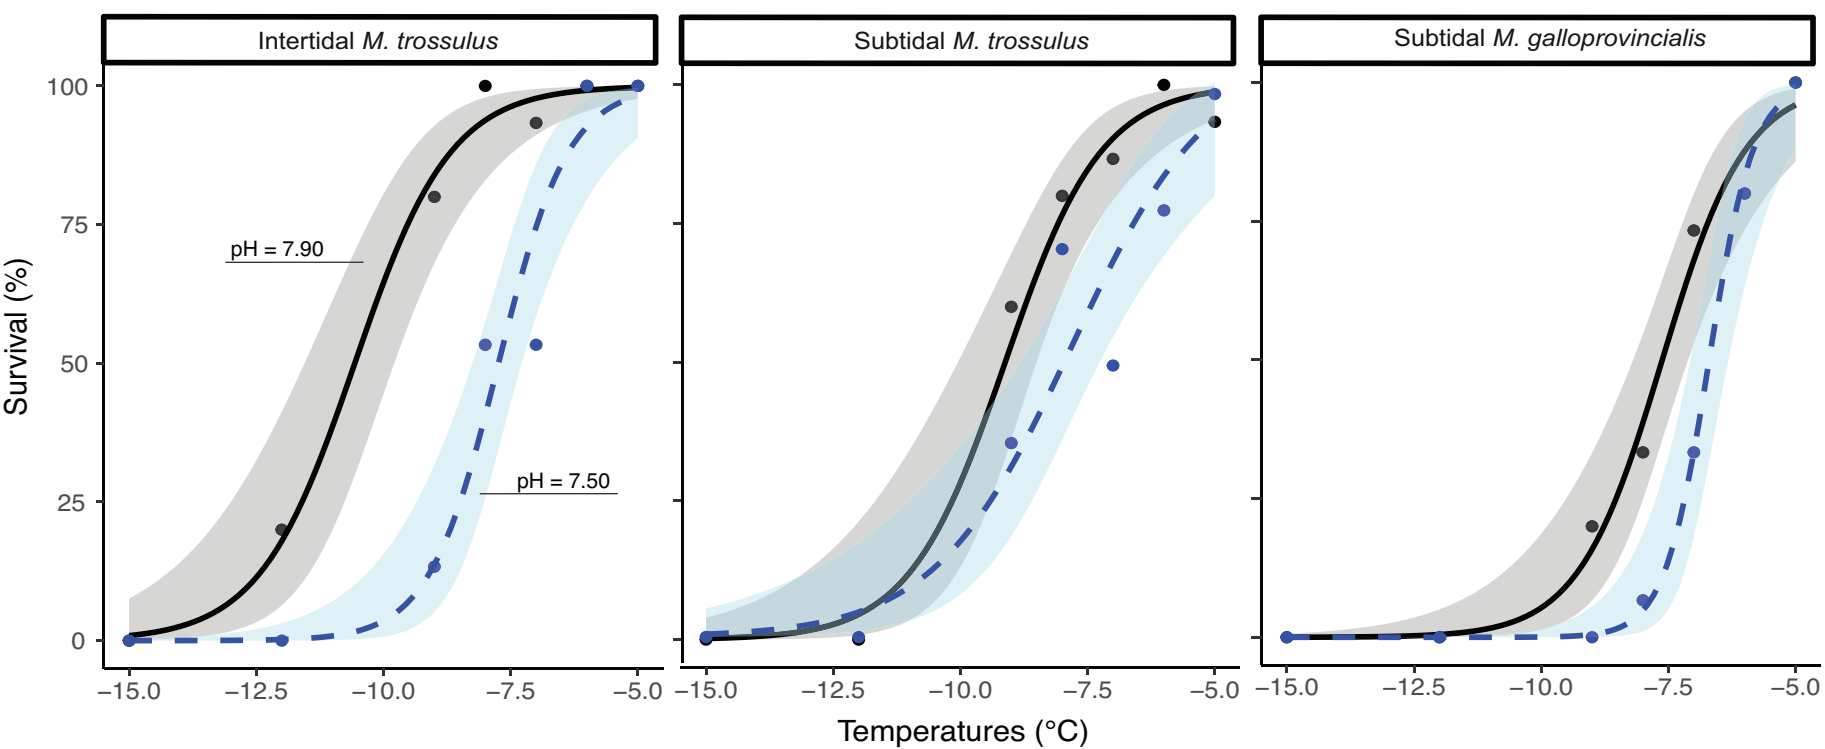

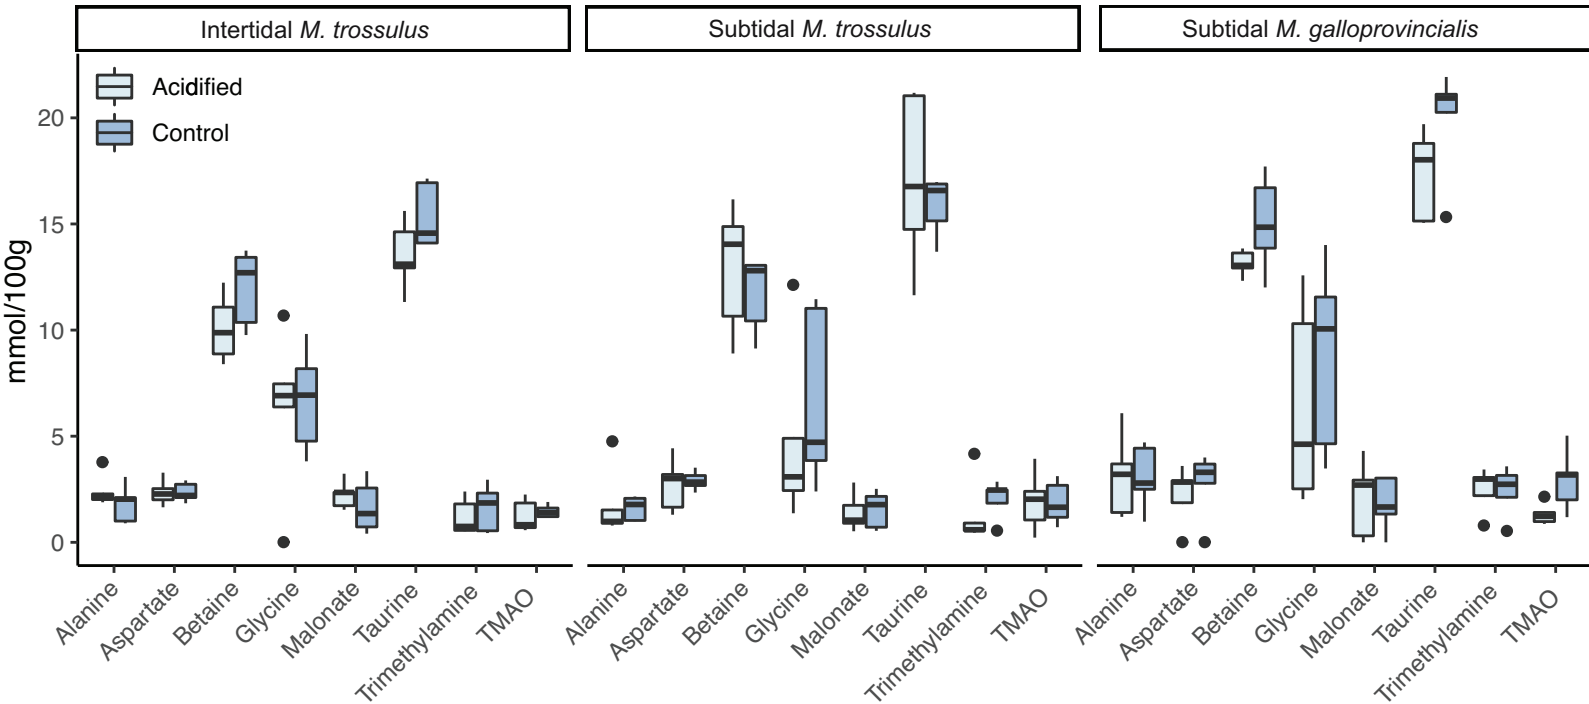

# Control

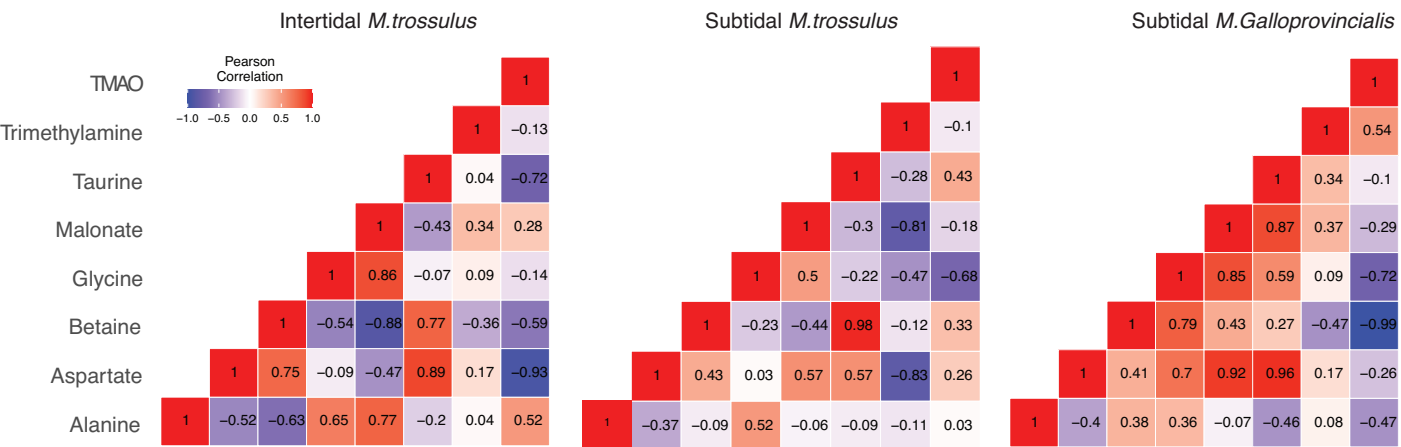

# Acidified

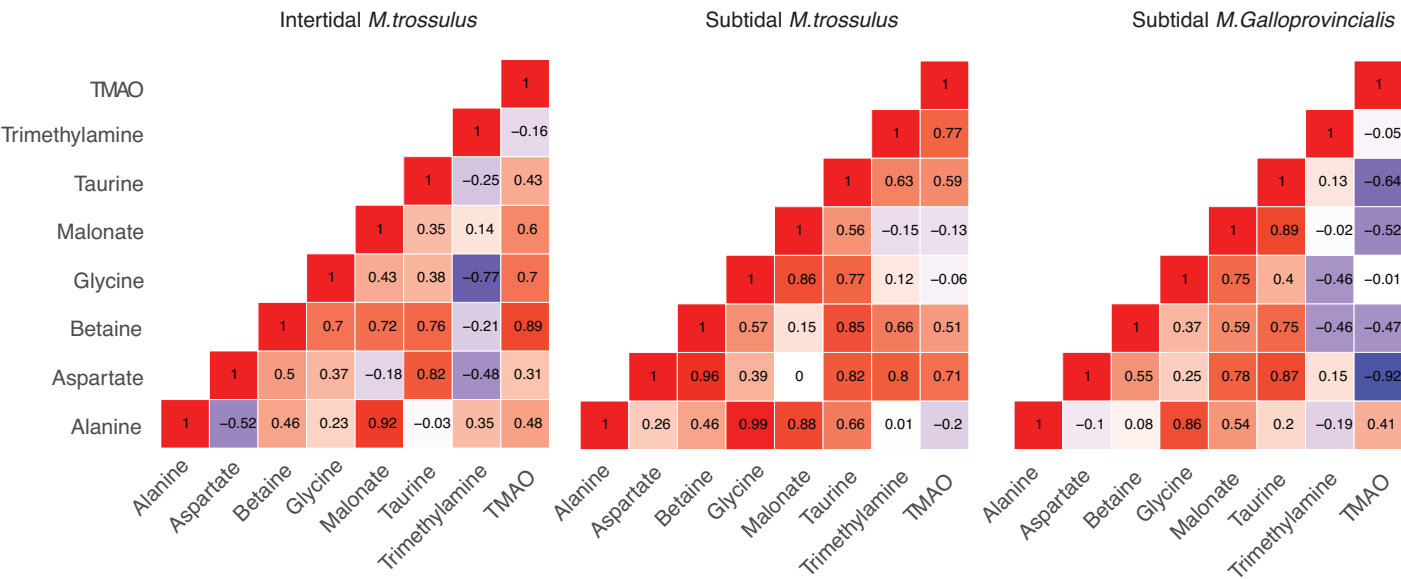

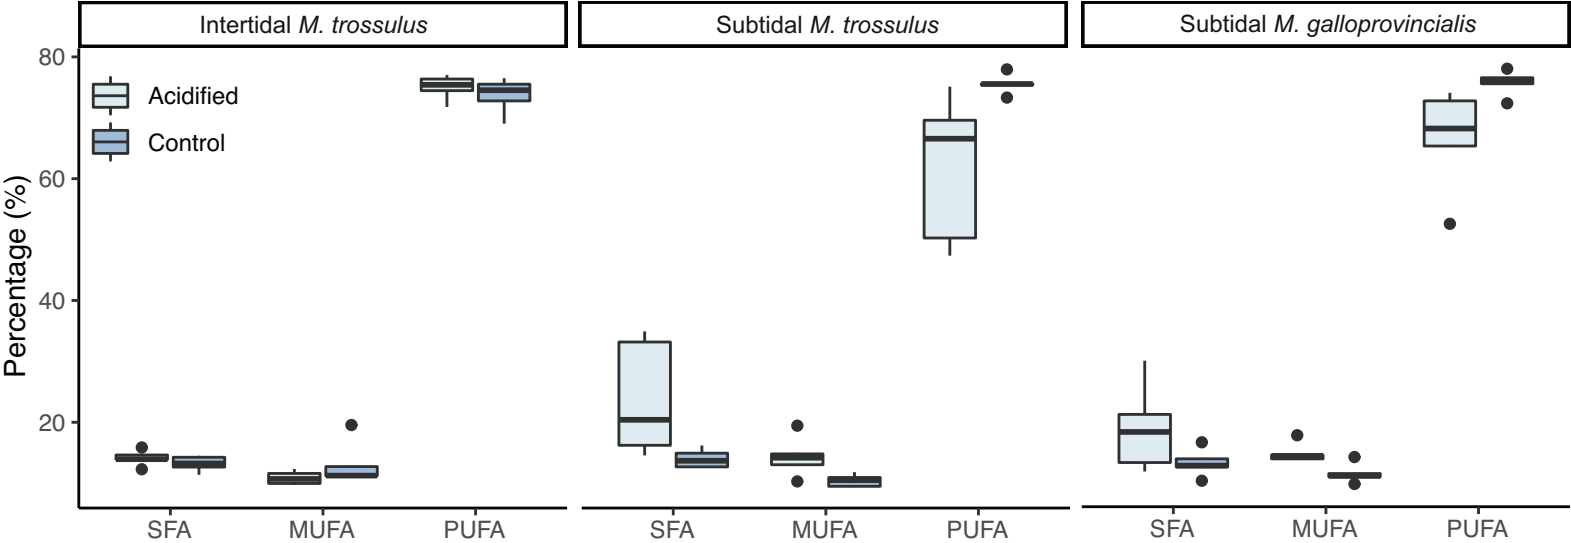

## Title

Ocean acidification increases susceptibility to sub-zero air temperatures in ecosystem engineers (*Mytilus* sp.): a limit to poleward range shifts

## Authors and addresses

Jakob Thyrring<sup>1,2\*</sup>, Colin D. MacLeod<sup>1,3</sup>, Katie E. Marshall<sup>1</sup>, Jessica Kennedy<sup>1</sup>, Réjean Tremblay<sup>4</sup> & Christopher D. G. Harley<sup>1,5</sup>

<sup>1</sup>Department of Zoology, University of British Columbia, V6T 1Z4, Vancouver, British Columbia, Canada

<sup>2</sup>Department of Ecoscience – Marine Ecology & Arctic Research Centre, Aarhus University, 8600, Silkeborg, Denmark

<sup>3</sup>Department of Biological Sciences, University of Alberta, Edmonton, Alberta T6G 2E9, Canada

<sup>4</sup>Institut des sciences de la mer, Université du Québec à Rimouski, G5L 3A Rimouski, Quebec, Canada

<sup>5</sup>Institute for the Oceans and Fisheries, University of British Columbia, Vancouver, BC V6T 1Z4, Canada

\*Corresponding author: [thyrring@ecos.au.dk](mailto:thyrring@ecos.au.dk)

## ORCID

*Jakob Thyrring* – 0000-0002-1029-3105

*Colin MacLeod* – 0000-0002-5963-3713

*Katie Marshall* – 0000-0002-6991-4957

*Jessica Kennedy* - 0000-0002-7979-1516

*Réjean Tremblay* – 0000-0003-2590-8915

*Christopher D.G. Harley* – 0000-0003-4099-943X

## Keywords

Blue mussel; Climate Change, Interactions, Intertidal; Fatty acids; LLT<sub>50</sub>; Multiple stressors;

Survival; Thermal tolerance

**Figure S1:** PCA plot based on (1)  $^1\text{H}$  NMR identified metabolites and (2) standard amino acids in intertidal *Mytilus trossulus*, subtidal *M. trossulus* and subtidal *M. galloprovincialis* after subjection to control (pH = 7.9) and low (pH = 7.5) pH treatment (n = 5).

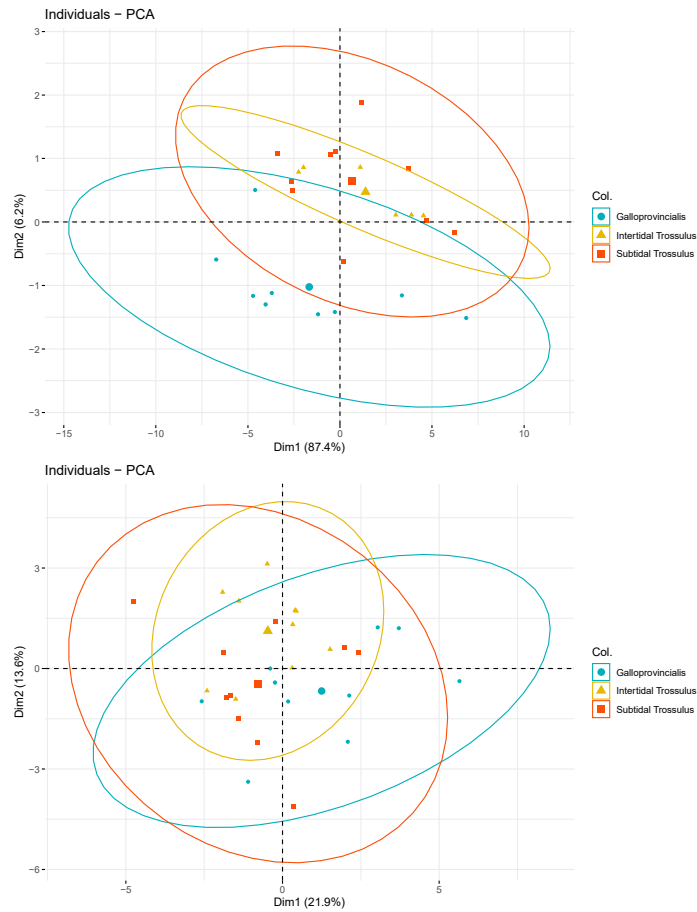

**Figure S2:** pH measurements from each incubator during the observation period. Incubators 1-3 were set to control conditions (pH = 7.9), while incubators 4-6 were set to acidified conditions (pH = 7.5).

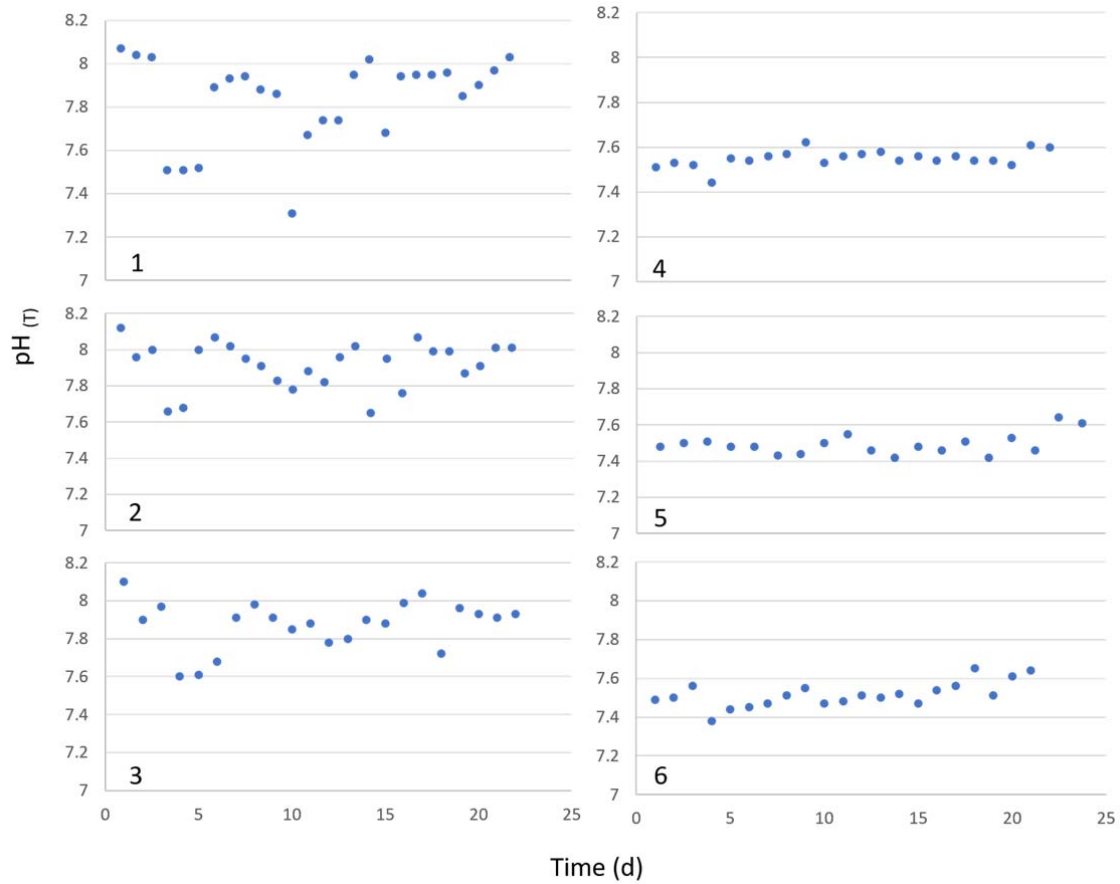

**Table S1:** Carbonate measurement data from the burke-o-lator system at Hakai Institute.

Bold numbers indicate anomalous values.

| Treatment                | Incubator | DIC<br>( $\mu\text{mol/kg}$ ) | TA<br>( $\mu\text{mol/kg}$ ) | pCO <sub>2</sub><br>( $\mu\text{atm}$ ) | pH<br>(total) | Aragonite<br>( $\Omega$ ) | Calcite<br>( $\Omega$ ) |
|--------------------------|-----------|-------------------------------|------------------------------|-----------------------------------------|---------------|---------------------------|-------------------------|
| Control<br>(start)       | 3         | 1230.64                       | 1335.34                      | 176.67                                  | 8.19          | 1.07                      | 1.76                    |
| Control<br>(start)       | 1         | 1260.26                       | 1362.46                      | 188.24                                  | 8.17          | 1.06                      | 1.74                    |
| Control<br>(start)       | 2         | 1272.46                       | 1316.33                      | 361.12                                  | 7.90          | 0.58                      | 0.96                    |
| <b>Control<br/>(end)</b> | 3         | <b>916.80</b>                 | <b>986.24</b>                | <b>170.48</b>                           | 8.08          | 0.63                      | 1.04                    |
| <b>Control<br/>(end)</b> | 2         | <b>705.92</b>                 | <b>776.96</b>                | <b>115.85</b>                           | 8.13          | 0.55                      | 0.90                    |
| <b>Control<br/>(end)</b> | 1         | <b>798.98</b>                 | <b>883.86</b>                | <b>118.12</b>                           | 8.17          | 0.69                      | 1.13                    |
| Acidified<br>(start)     | 5         | 1421.88                       | 1433.95                      | 621.42                                  | 7.71          | 0.42                      | 0.70                    |
| Acidified<br>(start)     | 6         | 1516.80                       | 1455.56                      | 1548.91                                 | 7.34          | 0.19                      | 0.31                    |
| Acidified<br>(start)     | 4         | 1599.63                       | 1607.00                      | 735.82                                  | 7.69          | 0.45                      | 0.75                    |
| Acidified<br>(end)       | 5         | 1620.13                       | 1637.31                      | 678.28                                  | 7.73          | 0.52                      | 0.85                    |
| Acidified<br>(end)       | 4         | 1712.32                       | 1653.04                      | 1600.13                                 | 7.37          | 0.24                      | 0.39                    |
| Acidified<br>(end)       | 6         | 1380.71                       | 1357.44                      | 985.94                                  | 7.49          | 0.26                      | 0.42                    |



**Table S2:** Mean percentage ( $\pm$  standard deviation) of all fatty acids after subjection to control (pH = 7.9) and acidified (pH = 7.5) conditions (n = 5). The summarized degree of SFA, MUFA and PUFA is presented.

| Fatty acid                     | <i>M. trossulus</i> - intertidal |                                  | <i>M. trossulus</i> - subtidal    |                                  | <i>M. galloprovincialis</i> - subtidal |                                  |
|--------------------------------|----------------------------------|----------------------------------|-----------------------------------|----------------------------------|----------------------------------------|----------------------------------|
|                                | Acidified                        | Control                          | Acidified                         | Control                          | Acidified                              | Control                          |
| 14:0                           | 0.40 $\pm$ 0.07                  | 0.4 $\pm$ 0.09                   | 0.54 $\pm$ 0.24                   | 0.3 $\pm$ 0.05                   | 0.62 $\pm$ 0.14                        | 0.37 $\pm$ 0.07                  |
| 15:0                           | 0.52 $\pm$ 0.04                  | 0.51 $\pm$ 0.05                  | 0.69 $\pm$ 0.21                   | 0.41 $\pm$ 0.05                  | 0.63 $\pm$ 0.26                        | 0.44 $\pm$ 0.09                  |
| 15:0iso                        | 0.07 $\pm$ 0.06                  | 0.09 $\pm$ 0.1                   | 0.2 $\pm$ 0.19                    | 0.16 $\pm$ 0.06                  | 0.00                                   | 0.08 $\pm$ 0.05                  |
| 16:0                           | 9.53 $\pm$ 0.89                  | 8.72 $\pm$ 1.21                  | 16.56 $\pm$ 6.62                  | 10.21 $\pm$ 1.21                 | 12.95 $\pm$ 5.17                       | 8.83 $\pm$ 1.44                  |
| 17:0                           | 0.45 $\pm$ 0.05                  | 0.43 $\pm$ 0.04                  | 0.88 $\pm$ 0.58                   | 0.38 $\pm$ 0.05                  | 0.61 $\pm$ 0.28                        | 0.41 $\pm$ 0.09                  |
| 17:0iso                        | 0.3 $\pm$ 0.07                   | 0.29 $\pm$ 0.05                  | 0.29 $\pm$ 0.13                   | 0.12 $\pm$ 0.02                  | 0.24 $\pm$ 0.07                        | 0.19 $\pm$ 0.02                  |
| 17:0ante                       | 0.17 $\pm$ 0.03                  | 0.14 $\pm$ 0.02                  | 0.19 $\pm$ 0.09                   | 0.08 $\pm$ 0.01                  | 0.17 $\pm$ 0.06                        | 0.12 $\pm$ 0.03                  |
| 18:0                           | 2.57 $\pm$ 0.34                  | 2.53 $\pm$ 0.17                  | 4.30 $\pm$ 1.98                   | 2.28 $\pm$ 0.38                  | 3.38 $\pm$ 1.26                        | 2.53 $\pm$ 0.67                  |
| 18:0iso                        | 0.11 $\pm$ 0.01                  | 0.1 $\pm$ 0.02                   | 0.21 $\pm$ 0.011                  | 0.08 $\pm$ 0.01                  | 0.21 $\pm$ 0.07                        | 0.17 $\pm$ 0.03                  |
| <b><math>\Sigma</math>SFA</b>  | <b>14.12<math>\pm</math>1.31</b> | <b>13.2<math>\pm</math>1.27</b>  | <b>23.86<math>\pm</math>9.57</b>  | <b>14.03<math>\pm</math>1.53</b> | <b>18.81<math>\pm</math>7.26</b>       | <b>13.12<math>\pm</math>2.3</b>  |
| 16:1n7                         | 1.01 $\pm$ 0.1                   | 1.2 $\pm$ 0.22                   | 1.58 $\pm$ 0.33                   | 0.97 $\pm$ 0.19                  | 1.71 $\pm$ 0.33                        | 1.07 $\pm$ 0.27                  |
| 17:1n7                         | 1.71 $\pm$ 0.63                  | 4.07 $\pm$ 4.16                  | 1.94 $\pm$ 1.14                   | 1.43 $\pm$ 1.1                   | 2.26 $\pm$ 1.63                        | 2.04 $\pm$ 2.15                  |
| 18:1n7                         | 1.48 $\pm$ 0.12                  | 1.37 $\pm$ 0.37                  | 1.91 $\pm$ 0.52                   | 1.21 $\pm$ 0.2                   | 2.08 $\pm$ 0.58                        | 1.5 $\pm$ 0.34                   |
| 18:1n9                         | 1.04 $\pm$ 0.16                  | 1.01 $\pm$ 0.24                  | 1.23 $\pm$ 0.32                   | 1.07 $\pm$ 0.29                  | 1.2 $\pm$ 0.33                         | 0.97 $\pm$ 0.26                  |
| 20:1n7                         | 0.65 $\pm$ 0.1                   | 0.60 $\pm$ 0.14                  | 0.75 $\pm$ 0.2                    | 0.34 $\pm$ 0.06                  | 0.97 $\pm$ 0.27                        | 0.61 $\pm$ 0.12                  |
| 20:1n9                         | 4.31 $\pm$ 0.3                   | 4.12 $\pm$ 0.46                  | 6.21 $\pm$ 1.13                   | 4.86 $\pm$ 0.61                  | 5.43 $\pm$ 1.32                        | 4.37 $\pm$ 0.48                  |
| 20:1n11                        | 0.67 $\pm$ 0.14                  | 0.74 $\pm$ 0.19                  | 0.74 $\pm$ 0.15                   | 0.53 $\pm$ 0.08                  | 1.14 $\pm$ 0.19                        | 0.82 $\pm$ 0.15                  |
| <b><math>\Sigma</math>MUFA</b> | <b>10.87<math>\pm</math>1.1</b>  | <b>13.13<math>\pm</math>3.68</b> | <b>14.36<math>\pm</math>3.33</b>  | <b>10.41<math>\pm</math>1.02</b> | <b>14.78<math>\pm</math>1.65</b>       | <b>11.39<math>\pm</math>1.63</b> |
| 18:2n6                         | 0.91 $\pm$ 0.1                   | 0.94 $\pm$ 0.35                  | 1.46 $\pm$ 0.67                   | 1.31 $\pm$ 0.25                  | 0.79 $\pm$ 0.36                        | 0.64 $\pm$ 0.14                  |
| 18:3n3                         | 1.12 $\pm$ 0.07                  | 1.21 $\pm$ 0.5                   | 1.04 $\pm$ 0.57                   | 1.52 $\pm$ 0.19                  | 0.31 $\pm$ 0.1                         | 0.36 $\pm$ 0.09                  |
| 18:4n3                         | 0.76 $\pm$ 0.19                  | 1.07 $\pm$ 0.41                  | 0.67 $\pm$ 0.25                   | 1.09 $\pm$ 0.28                  | 0.39 $\pm$ 0.13                        | 0.33 $\pm$ 0.11                  |
| 20:2n6                         | 0.44 $\pm$ 0.09                  | 0.46 $\pm$ 0.18                  | 0.51 $\pm$ 0.22                   | 0.67 $\pm$ 0.08                  | 0.32 $\pm$ 0.09                        | 0.3 $\pm$ 0.04                   |
| 20:2n                          | 9.41 $\pm$ 0.76                  | 8.82 $\pm$ 1.05                  | 11.96 $\pm$ 1.21                  | 9.87 $\pm$ 0.58                  | 9.78 $\pm$ 1.79                        | 8.67 $\pm$ 1.41                  |
| 20:3n6                         | 0.11 $\pm$ 0.02                  | 0.12 $\pm$ 0.04                  | 0.00                              | 0.09 $\pm$ 0.02                  | 0.16 $\pm$ 0.03                        | 0.12 $\pm$ 0.02                  |
| 20:4n6                         | 9.7 $\pm$ 1.1                    | 9.81 $\pm$ 0.9                   | 3.76 $\pm$ 2.61                   | 6.07 $\pm$ 0.76                  | 6.95 $\pm$ 2.43                        | 9.7 $\pm$ 1.37                   |
| 20:5n3                         | 9.78 $\pm$ 1.15                  | 10.74 $\pm$ 1.97                 | 4.87 $\pm$ 3.59                   | 12.19 $\pm$ 1.05                 | 7.0 $\pm$ 2.98                         | 10.21 $\pm$ 1.68                 |
| 22:2NMI                        | 11.54 $\pm$ 0.84                 | 10.86 $\pm$ 1.5                  | 12.72 $\pm$ 0.95                  | 9.55 $\pm$ 0.66                  | 13.53 $\pm$ 1.5                        | 12.19 $\pm$ 1.14                 |
| 22:6n3                         | 14.13 $\pm$ 0.99                 | 13.73 $\pm$ 0.69                 | 6.36 $\pm$ 4.86                   | 16.22 $\pm$ 0.48                 | 9.7 $\pm$ 4.61                         | 15.88 $\pm$ 2.06                 |
| TMTD                           | 0.14 $\pm$ 0.19                  | 0.1 $\pm$ 0.1                    | 0.51 $\pm$ 0.52                   | 0.09 $\pm$ 0.07                  | 0.17 $\pm$ 0.12                        | 0.12 $\pm$ 0.11                  |
| PUFA0                          | 1.19 $\pm$ 0.23                  | 0.98 $\pm$ 0.1                   | 1.51 $\pm$ 0.7                    | 2.36 $\pm$ 0.42                  | 0.72 $\pm$ 0.07                        | 0.81 $\pm$ 0.17                  |
| PUFA1                          | 2.62 $\pm$ 0.52                  | 2.47 $\pm$ 0.25                  | 2.84 $\pm$ 1.49                   | 4.06 $\pm$ 0.34                  | 1.37 $\pm$ 0.42                        | 1.72 $\pm$ 0.42                  |
| PUFA2                          | 0.93 $\pm$ 0.26                  | 0.86 $\pm$ 0.23                  | 0.4 $\pm$ 0.11                    | 0.38 $\pm$ 0.08                  | 0.91 $\pm$ 0.33                        | 1.09 $\pm$ 0.12                  |
| PUFA3                          | 0.68 $\pm$ 0.11                  | 0.64 $\pm$ 0.07                  | 0.46 $\pm$ 0.1                    | 0.52 $\pm$ 0.05                  | 0.77 $\pm$ 0.18                        | 1.14 $\pm$ 0.22                  |
| PUFA4                          | 11.54 $\pm$ 0.8                  | 10.86 $\pm$ 1.5                  | 12.72 $\pm$ 0.95                  | 9.55 $\pm$ 0.66                  | 13.52 $\pm$ 1.5                        | 12.19 $\pm$ 1.14                 |
| <b><math>\Sigma</math>PUFA</b> | <b>75.0<math>\pm</math>2.05</b>  | <b>73.67<math>\pm</math>2.93</b> | <b>61.78<math>\pm</math>12.27</b> | <b>75.56<math>\pm</math>1.65</b> | <b>66.4<math>\pm</math>8.57</b>        | <b>75.49<math>\pm</math>2.1</b>  |

**Table S3:** Estimated regression parameters, standard errors, z-values and p-values for the binomial generalized linear models (GLM).

| GLM Model<br>(Binomial distribution)                                    | Estimate | s.e  | z-value | p-value  |
|-------------------------------------------------------------------------|----------|------|---------|----------|
| Subtidal <i>Mytilus galloprovincialis</i> (Explained deviance = 95.37%) |          |      |         |          |
| Intercept                                                               | 11.96    | 1.81 | 6.59    | < 0.0001 |
| Air temperature                                                         | 1.58     | 0.24 | 6.63    | < 0.0001 |
| Low pH                                                                  | -1.42    | 0.50 | -2.82   | < 0.0001 |
| Subtidal <i>Mytilus trossulus</i> (Explained deviance = 91.49%)         |          |      |         |          |
| Intercept                                                               | 8.11     | 1.13 | 7.20    | < 0.0001 |
| Air temperature                                                         | 0.88     | 0.13 | 6.84    | < 0.0001 |
| Low pH                                                                  | -1.31    | 0.43 | -3.05   | < 0.0001 |
| Intertidal <i>Mytilus trossulus</i> (Explained deviance = 93.94%)       |          |      |         |          |
| Intercept                                                               | 12.71    | 1.83 | 6.93    | < 0.0001 |
| Air temperature                                                         | 1.21     | 0.17 | 6.79    | < 0.0001 |
| Low pH                                                                  | -3.29    | 0.70 | -4.73   | < 0.0001 |
| Survival among mussel categories (Explained deviance = 90.7%)           |          |      |         |          |
| Intercept                                                               | 7.08     | 0.79 | 11.15   | < 0.0001 |
| Air temperature                                                         | 0.99     | 0.10 | 11.32   | < 0.0001 |
| Intertidal <i>Mytilus trossulus</i>                                     | 1.80     | 0.34 | 5.97    | < 0.0001 |
| Subtidal <i>Mytilus trossulus</i>                                       | 1.25     | 0.32 | 4.45    | < 0.0001 |

**Table S4:** Mean ( $\pm$  standard deviation) metabolite concentration (nmol / 100 g ww gill tissue) detected from the  $H^1$ NMR analysis after subjection to control (pH = 7.9) and acidified (pH = 7.5) conditions (n = 5).

| Metabolites      | <i>M. trossulus</i> - intertidal |                  | <i>M. trossulus</i> - subtidal |                  | <i>M. galloprovincialis</i> - subtidal |                  |
|------------------|----------------------------------|------------------|--------------------------------|------------------|----------------------------------------|------------------|
|                  | Acidified                        | Control          | Acidified                      | Control          | Acidified                              | Control          |
| Acetate          | 0.41 $\pm$ 0.09                  | 0.42 $\pm$ 0.16  | 0.46 $\pm$ 0.09                | 0.36 $\pm$ 0.12  | 0.40 $\pm$ 0.16                        | 0.50 $\pm$ 0.16  |
| Acetoacetate     | 0.2 $\pm$ 0.13                   | 0.12 $\pm$ 0.12  | 0.05 $\pm$ 0.07                | 0.14 $\pm$ 0.15  | 0.11 $\pm$ 0.15                        | 0.20 $\pm$ 0.22  |
| Alanine          | 2.43 $\pm$ 0.78                  | 1.82 $\pm$ 0.90  | 1.79 $\pm$ 1.68                | 1.61 $\pm$ 0.56  | 3.12 $\pm$ 1.98                        | 3.08 $\pm$ 1.53  |
| AMP              | 0.47 $\pm$ 0.47                  | 0.37 $\pm$ 0.12  | 0.54 $\pm$ 0.22                | 0.55 $\pm$ 0.45  | 0.70 $\pm$ 0.36                        | 0.56 $\pm$ 0.24  |
| Arginine         | 0.46 $\pm$ 1.04                  | 0                | 0                              | 0                | 0.36 $\pm$ 0.8                         | 0                |
| Asparagine       | 0                                | 0                | 0.21 $\pm$ 0.48                | 0                | 0                                      | 0                |
| Aspartate        | 2.35 $\pm$ 0.62                  | 2.36 $\pm$ 0.45  | 2.72 $\pm$ 1.26                | 2.90 $\pm$ 0.45  | 2.24 $\pm$ 1.4                         | 2.75 $\pm$ 1.60  |
| Betaine          | 10.09 $\pm$ 1.58                 | 12.0 $\pm$ 1.82  | 12.93 $\pm$ 3.04               | 11.70 $\pm$ 1.81 | 13.15 $\pm$ 0.61                       | 15.03 $\pm$ 2.26 |
| Glutamate        | 2.52 $\pm$ 4.60                  | 0.35 $\pm$ 0.53  | 0.56 $\pm$ 0.87                | 0                | 0.13 $\pm$ 0.28                        | 0                |
| Glycine          | 6.29 $\pm$ 3.90                  | 6.70 $\pm$ 2.45  | 4.79 $\pm$ 4.30                | 6.69 $\pm$ 4.24  | 6.41 $\pm$ 4.76                        | 8.75 $\pm$ 4.52  |
| Guanidoacetate   | 0.18 $\pm$ 0.29                  | 0.025 $\pm$ 0.06 | 0.16 $\pm$ 0.26                | 0                | 0.07 $\pm$ 0.09                        | 0                |
| Lactate          | 0.22 $\pm$ 0.16                  | 0.38 $\pm$ 0.34  | 0.04 $\pm$ 0.06                | 0.16 $\pm$ 0.10  | 0.47 $\pm$ 0.35                        | 0.53 $\pm$ 0.24  |
| Lysine           | 0.15 $\pm$ 0.34                  | 0                | 0                              | 0                | 0.25 $\pm$ 0.56                        | 0.41 $\pm$ 0.91  |
| Malate           | 0.42 $\pm$ 0.93                  | 0                | 1.04 $\pm$ 1.44                | 0                | 0.36 $\pm$ 0.81                        | 0                |
| Malonate         | 2.24 $\pm$ 0.67                  | 1.70 $\pm$ 1.25  | 1.40 $\pm$ 0.91                | 1.54 $\pm$ 0.88  | 2.05 $\pm$ 1.84                        | 1.82 $\pm$ 1.28  |
| Proline          | 0.55 $\pm$ 0.76                  | 0                | 0                              | 0.27 $\pm$ 0.60  | 0.67 $\pm$ 0.92                        | 0                |
| Succinate        | 0.31 $\pm$ 0.10                  | 0.16 $\pm$ 0.11  | 0.36 $\pm$ 0.26                | 0.35 $\pm$ 0.24  | 0.30 $\pm$ 0.24                        | 0.41 $\pm$ 0.21  |
| Taurine          | 13.52 $\pm$ 1.66                 | 15.36 $\pm$ 1.54 | 17.07 $\pm$ 4.11               | 15.85 $\pm$ 1.42 | 17.34 $\pm$ 2.14                       | 19.91 $\pm$ 2.62 |
| Trimethylamine   | 1.21 $\pm$ 0.85                  | 1.62 $\pm$ 1.10  | 1.33 $\pm$ 1.59                | 2.04 $\pm$ 0.90  | 2.49 $\pm$ 1.05                        | 2.43 $\pm$ 1.19  |
| TAMO             | 1.24 $\pm$ 0.76                  | 1.46 $\pm$ 0.30  | 1.93 $\pm$ 1.41                | 1.87 $\pm$ 1.01  | 1.32 $\pm$ 0.50                        | 2.93 $\pm$ 1.46  |
| $\beta$ -Alanine | 0.87 $\pm$ 0.34                  | 0.68 $\pm$ 0.56  | 0.26 $\pm$ 0.43                | 0.54 $\pm$ 0.43  | 0.55 $\pm$ 0.67                        | 0.45 $\pm$ 0.35  |

**Table S5:** Mean ( $\pm$  standard deviation) carbonate measurements taken from discrete water samples at the start and end of the exposure period.

|         |       | PSU              | pH              | Alkalinity           | pCO <sub>2</sub>     | DIC                  | $\Omega$ aragonite | $\Omega$ calcite |
|---------|-------|------------------|-----------------|----------------------|----------------------|----------------------|--------------------|------------------|
| Control | Start | 22.43 $\pm$ 0.06 | 8.09 $\pm$ 0.16 | 1338.04 $\pm$ 23.18  | 242.01 103.32        | 1254.45 $\pm$ 21.50  | 0.90 $\pm$ 0.28    | 1.49 $\pm$ 0.46  |
|         | End   | 23.23 $\pm$ 0.32 | 8.13 $\pm$ 0.05 | 882.35 $\pm$ 104.65  | 134.82 $\pm$ 30.91   | 807.24 $\pm$ 105.68  | 0.62 $\pm$ 0.07    | 1.03 $\pm$ 0.12  |
| Low pH  | Start | 22.53 $\pm$ 0.06 | 7.58 $\pm$ 0.21 | 1498.84 $\pm$ 94.29  | 968.71 $\pm$ 505.71  | 1412.77 $\pm$ 88.94  | 0.36 $\pm$ 0.15    | 0.59 $\pm$ 0.24  |
|         | End   | 23.57 $\pm$ 0.23 | 7.53 $\pm$ 0.18 | 1549.26 $\pm$ 166.31 | 1088.12 $\pm$ 469.34 | 1571.05 $\pm$ 171.16 | 0.34 $\pm$ 0.16    | 0.55 $\pm$ 0.26  |
